# Supplementary material for: Identification of Differentially Expressed Non-coding RNA Networks With Potential Immunoregulatory Roles During Salmonella Enteritidis Infection in Ducks
Source: Front Vet Sci. 2021 Jun 16;8:692501. doi: 10.3389/fvets.2021.692501 (PMC8242174; doi:10.3389/fvets.2021.692501)
Supplement: Supplementary Table 11 — Gene ontology classification of differentially expressed circRNAs between 0, 3, and 6 hpi. [file Table_11.XLSX]

## Sheet: circRNA DE
Table S6. Analysis of differentially expressed circRNAs between 0, 3, and 6 hpi
Differentially expressed circRNAs between 0 and 3 hpi
ID	T_3h_readcount	T_0h_readcount	log2FoldChange	pval	padj
novel_circ_0006066	525.84	146.738	1.8336	4.95e-47	2.01e-43
novel_circ_0021339	259.648	0.679152	7.1067	2.1e-34	4.26e-31
novel_circ_0000698	140.171	385.941	-1.455	1.47e-32	1.49e-29
novel_circ_0018388	16.3778	386.041	-4.3818	1.29e-32	1.49e-29
novel_circ_0003348	139.891	0	6.9449	4.18e-23	3.39e-20
novel_circ_0000056	0	82.9169	-6.5774	4.87e-20	3.29e-17
novel_circ_0015739	86.1879	8.91014	3.1555	1.74e-18	1.01e-15
novel_circ_0017898	43.9463	143.07	-1.6844	1.82e-17	9.24e-15
novel_circ_0012618	53.7579	1.01873	4.7648	4.51e-15	2.03e-12
novel_circ_0018151	165.809	58.4202	1.4955	8.72e-15	3.54e-12
novel_circ_0019930	333.455	173.798	0.93738	3.41e-14	1.26e-11
novel_circ_0000605	71.7007	11.9454	2.4875	3.97e-14	1.29e-11
novel_circ_0006241	173.602	66.0053	1.3849	4.14e-14	1.29e-11
novel_circ_0001064	45.2434	0	5.5562	2.38e-13	6.89e-11
novel_circ_0002238	11.1157	61.9242	-2.3839	3.58e-13	9.69e-11
novel_circ_0019800	214.614	393.17	-0.8708	1.03e-12	2.61e-10
novel_circ_0012170	27.4619	94.0156	-1.7366	1.31e-12	2.95e-10
novel_circ_0020798	51.1684	5.12235	3.1124	1.24e-12	2.95e-10
novel_circ_0007905	39.576	0	5.3843	2.25e-12	4.8e-10
novel_circ_0002429	178.938	71.6236	1.3157	3.36e-12	6.81e-10
novel_circ_0002433	742.893	476.531	0.64002	5.6e-12	1.08e-09
novel_circ_0008663	130.711	50.5606	1.3536	6.44e-12	1.19e-09
novel_circ_0006644	33.8234	0	5.1865	2.45e-11	4.33e-09
novel_circ_0018338	1.23771	32.8616	-4.1072	2.72e-11	4.59e-09
novel_circ_0008220	78.3901	21.0149	1.8487	6.88e-11	1.12e-08
novel_circ_0019731	3.68795	37.5441	-3.0813	1.04e-10	1.63e-08
novel_circ_0005183	33.0153	0.784377	4.3655	1.09e-10	1.64e-08
novel_circ_0016139	248.403	125.375	0.98475	1.55e-10	2.24e-08
novel_circ_0001878	9.17592	48.9646	-2.3128	3.08e-10	4.31e-08
novel_circ_0017488	129.402	239.295	-0.88181	4.47e-10	6.05e-08
novel_circ_0001078	30.0919	0.739678	4.2205	8.57e-10	1.12e-07
novel_circ_0003435	436.352	276.477	0.65518	9.09e-10	1.15e-07
novel_circ_0001069	25.3992	0	4.8339	1.19e-09	1.46e-07
novel_circ_0017899	31.3288	87.8735	-1.4625	1.44e-09	1.72e-07
novel_circ_0013692	823.381	507.137	0.69553	1.66e-09	1.85e-07
novel_circ_0018123	0	21.1856	-4.8283	1.68e-09	1.85e-07
novel_circ_0020099	50.1022	10.1935	2.194	1.69e-09	1.85e-07
novel_circ_0019131	33.6888	95.981	-1.4896	1.74e-09	1.85e-07
novel_circ_0009418	72.788	20.9368	1.7708	1.86e-09	1.94e-07
novel_circ_0017651	4.65409	35.3437	-2.7372	1.93e-09	1.96e-07
novel_circ_0015941	49.9639	9.25918	2.2947	2e-09	1.97e-07
novel_circ_0020833	29.7223	1.3583	3.7071	2.62e-09	2.53e-07
novel_circ_0010892	78.9822	25.4435	1.6048	3.15e-09	2.97e-07
novel_circ_0020406	376.728	227.336	0.72386	3.44e-09	3.17e-07
novel_circ_0005121	22.4169	0	4.6775	5.63e-09	5.07e-07
novel_circ_0001067	21.7509	0	4.6446	7.66e-09	6.76e-07
novel_circ_0010430	0.928286	22.7783	-3.845	8.12e-09	7.01e-07
novel_circ_0021591	0	18.147	-4.6568	8.77e-09	7.42e-07
novel_circ_0001698	456.956	278.215	0.71688	9.51e-09	7.87e-07
novel_circ_0000714	0.772658	23.0939	-3.8626	1.13e-08	9.14e-07
novel_circ_0010699	7.84095	39.546	-2.2281	1.21e-08	9.63e-07
novel_circ_0018031	20.3575	0	4.5656	1.63e-08	1.27e-06
novel_circ_0006225	32.6422	3.51681	2.8876	1.95e-08	1.49e-06
novel_circ_0019696	484.066	309.73	0.64101	2.01e-08	1.51e-06
novel_circ_0018365	0	17.2271	-4.5668	2.2e-08	1.62e-06
novel_circ_0004304	29.0108	2.46782	3.1239	2.33e-08	1.68e-06
novel_circ_0014419	0.772658	21.2766	-3.7736	2.41e-08	1.72e-06
novel_circ_0002431	243.143	143.145	0.75985	2.95e-08	2.06e-06
novel_circ_0010923	22.2507	73.3389	-1.649	3.73e-08	2.57e-06
novel_circ_0010051	9.13339	46.0141	-2.1997	3.9e-08	2.64e-06
novel_circ_0007900	18.5121	0	4.4481	4.74e-08	3.15e-06
novel_circ_0005273	39.9803	7.99028	2.1968	6e-08	3.93e-06
novel_circ_0011698	0	15.8925	-4.4339	7.71e-08	4.97e-06
novel_circ_0014672	420.604	282.138	0.5732	9.11e-08	5.77e-06
novel_circ_0007864	29.1787	3.59177	2.7357	9.61e-08	6e-06
novel_circ_0002796	35.1612	86.89	-1.2769	1.15e-07	7.06e-06
novel_circ_0003349	4.55969	30.6841	-2.5305	1.23e-07	7.45e-06
novel_circ_0009171	41.1885	8.19436	2.1757	1.45e-07	8.64e-06
novel_circ_0004499	16.943	0	4.3155	1.58e-07	9.28e-06
novel_circ_0017672	58.5117	18.5455	1.6245	1.78e-07	1.03e-05
novel_circ_0002674	241.84	147.723	0.70507	1.94e-07	1.1e-05
novel_circ_0009839	16.5396	0	4.29	1.95e-07	1.1e-05
novel_circ_0007807	16.3101	0	4.2818	2.04e-07	1.13e-05
novel_circ_0000906	30.0097	4.38406	2.5481	2.22e-07	1.22e-05
novel_circ_0006544	0	13.8379	-4.2948	2.32e-07	1.25e-05
novel_circ_0019276	107.079	50.6818	1.065	2.43e-07	1.29e-05
novel_circ_0004741	1.42937	20.3104	-3.2491	2.54e-07	1.34e-05
novel_circ_0000920	32.9278	5.88577	2.3251	2.66e-07	1.38e-05
novel_circ_0020106	41.2245	10.0499	1.9568	3.09e-07	1.58e-05
novel_circ_0009353	89.2763	36.8873	1.2551	3.36e-07	1.71e-05
novel_circ_0000649	40.3958	90.3158	-1.1386	3.67e-07	1.84e-05
novel_circ_0006645	15.5847	0	4.2097	3.8e-07	1.88e-05
novel_circ_0010994	15.2402	0	4.2003	4e-07	1.96e-05
novel_circ_0011601	58.9715	116.944	-0.98013	4.16e-07	2.01e-05
novel_circ_0007219	15.1318	0	4.1896	4.4e-07	2.1e-05
novel_circ_0014707	15.1458	0	4.1877	4.5e-07	2.12e-05
novel_circ_0003877	1.84722	20.8015	-3.0795	4.78e-07	2.23e-05
novel_circ_0020237	6.40224	31.9782	-2.1849	5.67e-07	2.62e-05
novel_circ_0005368	2.60119	23.5563	-2.8305	6e-07	2.74e-05
novel_circ_0020006	15.545	50.1478	-1.6383	6.6e-07	2.97e-05
novel_circ_0018394	38.9491	7.92975	2.1454	8.26e-07	3.68e-05
novel_circ_0014442	0	12.7758	-4.1399	8.77e-07	3.87e-05
novel_circ_0009429	14.0591	0	4.096	9.26e-07	4.04e-05
novel_circ_0012302	0	12.0874	-4.1161	9.76e-07	4.21e-05
novel_circ_0004305	25.4585	3.2522	2.6625	1.01e-06	4.31e-05
novel_circ_0008630	19.8611	1.46353	3.1598	1.02e-06	4.32e-05
novel_circ_0014850	14.4315	0	4.088	1.04e-06	4.36e-05
novel_circ_0020443	14.0282	0	4.0723	1.14e-06	4.73e-05
novel_circ_0006591	136.581	71.7112	0.91482	1.32e-06	5.36e-05
novel_circ_0015983	7.67781	33.3416	-2.0202	1.31e-06	5.36e-05
novel_circ_0000781	142.255	230.865	-0.69419	1.37e-06	5.49e-05
novel_circ_0014513	17.0809	0.739678	3.4929	1.42e-06	5.65e-05
novel_circ_0008918	0	11.8451	-4.0686	1.44e-06	5.68e-05
novel_circ_0011161	19.8634	1.41883	3.1466	1.48e-06	5.79e-05
novel_circ_0010937	18.2686	1.01873	3.2928	1.61e-06	6.21e-05
novel_circ_0009672	30.5842	5.68976	2.23	1.64e-06	6.28e-05
novel_circ_0006490	21.6598	1.78867	3.0397	1.67e-06	6.33e-05
novel_circ_0013232	47.5847	98.8508	-1.0412	1.76e-06	6.61e-05
novel_circ_0018745	0	11.378	-4.0327	1.85e-06	6.89e-05
novel_circ_0002621	53.8015	18.5694	1.4898	2.14e-06	7.87e-05
novel_circ_0020177	0	11.1978	-4.0071	2.28e-06	8.32e-05
novel_circ_0018384	0	11.9596	-4.0161	2.32e-06	8.41e-05
novel_circ_0008380	0	11.1739	-3.9842	2.72e-06	9.68e-05
novel_circ_0011695	0	11.1292	-3.9846	2.7e-06	9.68e-05
novel_circ_0018671	10.7516	38.7126	-1.7682	2.87e-06	0.00010117
novel_circ_0004336	12.6016	0	3.9383	3.13e-06	0.00010961
novel_circ_0011549	11.226	39.6976	-1.764	3.36e-06	0.00011646
novel_circ_0000958	106.912	55.6699	0.93268	3.51e-06	0.00011691
novel_circ_0006260	0.515106	13.7629	-3.4652	3.43e-06	0.00011691
novel_circ_0012171	54.4221	113.079	-1.0433	3.49e-06	0.00011691
novel_circ_0016980	12.396	0	3.9213	3.52e-06	0.00011691
novel_circ_0021314	12.3203	0	3.921	3.49e-06	0.00011691
novel_circ_0015035	35.3776	8.37455	1.9584	3.6e-06	0.0001188
novel_circ_0010441	26.7382	4.50373	2.3675	3.71e-06	0.00012145
novel_circ_0009843	12.3081	0	3.9092	3.82e-06	0.00012408
novel_circ_0013365	12.1431	0	3.8991	4.09e-06	0.00013181
novel_circ_0000917	34.2646	8.51143	1.9076	4.32e-06	0.000137
novel_circ_0000929	9.81062	40.4927	-1.9524	4.29e-06	0.000137
novel_circ_0007918	12.1978	0	3.8918	4.43e-06	0.00013931
novel_circ_0007110	38.3102	10.7146	1.7652	4.5e-06	0.00014047
novel_circ_0014758	0.618857	13.4759	-3.4137	4.58e-06	0.00014178
novel_circ_0004432	2.93866	21.5123	-2.5778	4.74e-06	0.00014575
novel_circ_0016503	0.515106	13.7471	-3.4419	4.79e-06	0.00014625
novel_circ_0017643	45.9865	14.5234	1.6103	5.07e-06	0.00015241
novel_circ_0018753	0	10.3671	-3.8957	5.07e-06	0.00015241
novel_circ_0014992	27.0033	5.11583	2.2148	5.34e-06	0.00015928
novel_circ_0013233	8.14571	31.4109	-1.8528	5.73e-06	0.00016983
novel_circ_0000936	0	10.4277	-3.8744	6.07e-06	0.00017769
novel_circ_0009974	256.722	164.248	0.64601	6.09e-06	0.00017769
novel_circ_0016529	19.0885	1.8492	2.8664	7.1e-06	0.00020577
novel_circ_0007574	11.6135	0	3.8181	7.46e-06	0.00021452
novel_circ_0018723	22.4955	55.3304	-1.2653	8.99e-06	0.00025673
novel_circ_0010883	43.8041	13.4455	1.6437	9.09e-06	0.000258
novel_circ_0011694	0	9.64982	-3.7987	9.9e-06	0.00027895
novel_circ_0006153	0	9.43937	-3.7862	1.07e-05	0.00029886
novel_circ_0018505	10.9881	0	3.7618	1.09e-05	0.00030013
novel_circ_0019952	0.60951	12.706	-3.3199	1.08e-05	0.00030013
novel_circ_0011281	71.5156	30.7974	1.1872	1.28e-05	0.00034967
novel_circ_0019778	105.802	56.8386	0.89085	1.38e-05	0.00037364
novel_circ_0021211	0	9.1524	-3.7467	1.38e-05	0.00037364
novel_circ_0009069	66.5347	28.0931	1.208	1.4e-05	0.00037579
novel_circ_0000930	15.2706	44.3831	-1.5013	1.41e-05	0.00037602
novel_circ_0012973	43.7173	87.1673	-0.97977	1.42e-05	0.00037602
novel_circ_0002263	10.5599	0	3.7113	1.5e-05	0.00039469
novel_circ_0008928	12.5278	38.0731	-1.5475	1.54e-05	0.0004009
novel_circ_0009456	18.0943	47.3531	-1.3419	1.54e-05	0.0004009
novel_circ_0004527	1.94448	16.7952	-2.6565	1.65e-05	0.00042563
novel_circ_0015094	0.618857	12.5719	-3.2798	1.68e-05	0.00043141
novel_circ_0005495	0	9.32607	-3.7179	1.74e-05	0.00044477
novel_circ_0013534	65.5519	28.8889	1.1684	1.86e-05	0.00047082
novel_circ_0006151	0.928286	13.2574	-3.0725	2.09e-05	0.00052748
novel_circ_0018293	0	8.90362	-3.6795	2.19e-05	0.00054732
novel_circ_0001121	65.9778	120.285	-0.85192	2.32e-05	0.00057622
novel_circ_0010877	53.705	21.8281	1.2567	2.45e-05	0.00060545
novel_circ_0014267	9.83263	0	3.6217	2.68e-05	0.00065942
novel_circ_0019693	10.1107	0	3.6184	2.82e-05	0.00068992
novel_circ_0008652	9.84483	0	3.6102	2.95e-05	0.00071143
novel_circ_0012829	33.1667	9.77894	1.6657	2.95e-05	0.00071143
novel_circ_0007235	0	8.29307	-3.5977	3.64e-05	0.00087392
novel_circ_0020129	333.376	226.586	0.55161	3.69e-05	0.00088053
novel_circ_0000783	6.4191	26.5963	-1.8839	3.82e-05	0.00090553
novel_circ_0017421	26.1783	6.32266	1.9212	3.95e-05	0.00093198
novel_circ_0002903	6.00775	24.5972	-1.8877	4.03e-05	0.00093969
novel_circ_0005593	0	8.53239	-3.5863	4.02e-05	0.00093969
novel_circ_0015985	4.82659	22.1915	-2.0176	4.09e-05	0.00094743
novel_circ_0009359	48.3859	19.2694	1.3011	4.14e-05	0.00095409
novel_circ_0006582	0	8.02845	-3.5725	4.17e-05	0.0009551
novel_circ_0009979	74.6478	35.4552	1.0581	4.21e-05	0.00095973
novel_circ_0005784	61.3886	106.969	-0.78881	4.28e-05	0.0009704
novel_circ_0008379	1.70094	14.7209	-2.6278	4.35e-05	0.00097998
novel_circ_0012250	5.69832	23.8128	-1.908	4.4e-05	0.00098627
novel_circ_0016231	69.8488	118.898	-0.75967	4.5e-05	0.0010032
novel_circ_0016475	65.7864	30.8607	1.0705	4.55e-05	0.0010077
novel_circ_0020682	217.174	144.879	0.5785	4.61e-05	0.0010158
novel_circ_0003692	20.522	2.8074	2.4582	4.73e-05	0.0010362
novel_circ_0018623	0.60951	11.0081	-3.1195	4.91e-05	0.0010705
novel_circ_0021059	91.4184	47.2734	0.9282	5.03e-05	0.0010921
novel_circ_0014136	106.105	59.6713	0.81756	5.31e-05	0.0011461
novel_circ_0004422	0.928286	12.277	-2.9619	5.36e-05	0.0011499
novel_circ_0003446	79.8877	132.172	-0.71591	5.45e-05	0.0011636
novel_circ_0016045	4.29461	23.2259	-2.2246	5.89e-05	0.001252
novel_circ_0007111	144.52	89.2997	0.69062	6.02e-05	0.0012716
novel_circ_0021486	14.4489	1.52405	2.7082	6.41e-05	0.0013479
novel_circ_0011401	27.5137	6.91102	1.8533	6.47e-05	0.001354
novel_circ_0011439	8.67016	0	3.4728	6.59e-05	0.0013647
novel_circ_0012556	1.39152	13.401	-2.6856	6.56e-05	0.0013647
novel_circ_0001103	28.6599	6.44371	2.0056	6.72e-05	0.00138
novel_circ_0005370	6.55604	25.2987	-1.8096	6.77e-05	0.00138
novel_circ_0018493	21.3943	49.18	-1.1693	6.75e-05	0.00138
novel_circ_0012175	87.4892	143.903	-0.71355	6.89e-05	0.001397
novel_circ_0012725	31.95	8.08914	1.8208	7.77e-05	0.0015688
novel_circ_0013578	62.8456	27.5482	1.1576	7.89e-05	0.0015839
novel_circ_0016664	3.78703	18.7049	-2.0949	8.22e-05	0.0016428
novel_circ_0017669	0	7.37165	-3.4548	8.35e-05	0.0016609
novel_circ_0018395	8.55239	0	3.4313	8.6e-05	0.0017013
novel_circ_0011343	15.1149	1.89389	2.5533	8.94e-05	0.0017597
novel_circ_0003840	12.0173	0.739678	2.9819	9.57e-05	0.00187
novel_circ_0008969	168.486	248.445	-0.55735	9.59e-05	0.00187
novel_circ_0007647	28.8581	8.47325	1.6737	0.00010333	0.0020058
novel_circ_0007208	0	7.22825	-3.4151	0.00010612	0.0020501
novel_circ_0006106	9.93923	31.5768	-1.5737	0.00010708	0.0020589
novel_circ_0002101	8.11253	0	3.3803	0.00011314	0.0021652
novel_circ_0000634	29.3231	61.2961	-1.0334	0.00011473	0.0021852
novel_circ_0002707	0	7.05442	-3.3848	0.0001246	0.0023402
novel_circ_0013639	0	7.05442	-3.3848	0.0001246	0.0023402
novel_circ_0015982	14.9827	38.1639	-1.299	0.00012358	0.0023402
novel_circ_0015252	0.60951	10.3434	-3.0004	0.00012591	0.002354
novel_circ_0015900	42.0364	16.0346	1.331	0.00012703	0.0023641
novel_circ_0008265	8.14856	0	3.3579	0.00013175	0.0024406
novel_circ_0018011	37.8545	13.7103	1.3985	0.00013754	0.0025363
novel_circ_0015426	82.1593	45.1752	0.84711	0.00014186	0.0026042
novel_circ_0019797	390.721	512.304	-0.39016	0.00014341	0.0026207
novel_circ_0003766	19.2643	3.31925	2.2434	0.00014491	0.0026364
novel_circ_0015267	13.6902	35.8713	-1.3431	0.00014798	0.0026801
novel_circ_0011432	11.3611	0.679152	2.9217	0.00015097	0.0027221
novel_circ_0009006	26.4172	7.73357	1.6705	0.00015233	0.0027345
novel_circ_0013255	0	7.07025	-3.3508	0.00015333	0.0027404
novel_circ_0018035	7.78441	0	3.3251	0.00015433	0.0027461
novel_circ_0017039	12.7713	34.4655	-1.3767	0.00016054	0.0028442
novel_circ_0015476	11.3022	0.784377	2.9005	0.00016229	0.0028627
novel_circ_0012843	47.1869	19.11	1.2724	0.00017127	0.003008
novel_circ_0018079	7.5834	0	3.2956	0.00018038	0.0031544
novel_circ_0014739	0	6.60962	-3.3136	0.00018256	0.0031788
novel_circ_0012159	0	6.63197	-3.3122	0.00018446	0.0031981
novel_circ_0015480	7.59742	0	3.2913	0.00018537	0.0032002
novel_circ_0011109	7.489	0	3.288	0.0001875	0.0032232
novel_circ_0006227	7.6493	0	3.2889	0.00018891	0.0032339
novel_circ_0009749	80.8407	41.5966	0.93402	0.00019452	0.0033159
novel_circ_0003486	7.49834	0	3.2799	0.00019697	0.0033335
novel_circ_0011451	108.112	62.5313	0.77127	0.0001972	0.0033335
novel_circ_0012484	7.52218	0	3.2678	0.00021227	0.0035734
novel_circ_0009390	62.8338	32.0215	0.95604	0.00021458	0.0035972
novel_circ_0004051	0	6.62406	-3.2849	0.00021602	0.0036065
novel_circ_0010022	53.2003	91.5913	-0.77277	0.0002171	0.0036097
novel_circ_0001549	170.601	114.69	0.56905	0.00021817	0.0036127
novel_circ_0015427	24.6405	6.86632	1.7088	0.00022676	0.0037396
novel_circ_0003882	2.51613	15.3236	-2.2379	0.00023215	0.003813
novel_circ_0010874	19.7073	3.89317	2.0622	0.00023671	0.0038724
novel_circ_0021313	24.3858	6.67015	1.7503	0.00023804	0.0038785
novel_circ_0004093	8.05598	25.8819	-1.5842	0.00025093	0.0040398
novel_circ_0010954	0	6.44387	-3.2574	0.00024974	0.0040398
novel_circ_0012105	31.1109	61.899	-0.97554	0.00025024	0.0040398
novel_circ_0020880	0	6.70057	-3.258	0.00025551	0.0040973
novel_circ_0001077	7.1749	0	3.2288	0.00025798	0.0041205
novel_circ_0017733	99.8334	154.049	-0.6136	0.00026182	0.0041654
novel_circ_0012289	10.5202	0.739678	2.823	0.00026335	0.0041734
novel_circ_0006156	67.379	109.175	-0.69145	0.00026484	0.0041808
novel_circ_0013247	33.1138	11.0926	1.474	0.00026877	0.0042263
novel_circ_0004386	0	6.21743	-3.2336	0.00027804	0.0043552
novel_circ_0000417	0	6.34501	-3.2324	0.00028244	0.004389
novel_circ_0006335	1.03021	11.4241	-2.6482	0.00028133	0.004389
novel_circ_0019632	36.4068	12.9034	1.4266	0.00028344	0.004389
novel_circ_0000416	0	6.18717	-3.2267	0.00028847	0.0044498
novel_circ_0003691	11.5313	0.784377	2.8503	0.00029546	0.0045233
novel_circ_0010478	0	6.19508	-3.2228	0.00029502	0.0045233
novel_circ_0015031	14.6045	2.24791	2.3157	0.00030033	0.0045805
novel_circ_0003337	20.6903	5.16053	1.8406	0.00030793	0.004647
novel_circ_0017419	17.7592	3.66674	2.0397	0.00030651	0.004647
novel_circ_0018796	6.97389	0	3.194	0.00030812	0.004647
novel_circ_0015938	6.92669	0	3.1876	0.00031846	0.0047771
novel_circ_0019075	6.92202	0	3.1872	0.0003191	0.0047771
novel_circ_0011144	0	6.30822	-3.2083	0.00032209	0.0047865
novel_circ_0015314	0	6.30822	-3.2083	0.00032209	0.0047865
novel_circ_0002454	3.02189	16.548	-2.1284	0.00032335	0.0047877
novel_circ_0010086	7.04263	0	3.1825	0.00033314	0.0049147
novel_circ_0011311	22.4104	5.46193	1.8552	0.00034141	0.0050185
novel_circ_0019995	52.9983	90.3026	-0.76246	0.00034555	0.0050571
novel_circ_0020610	24.3026	6.70693	1.7342	0.00034653	0.0050571
novel_circ_0014138	6.99076	0	3.169	0.00035788	0.0051975
novel_circ_0016224	3.27944	16.7584	-2.0506	0.00035871	0.0051975
novel_circ_0007949	0.515106	9.28137	-2.8595	0.00036411	0.005257
novel_circ_0002588	6.94071	0	3.1582	0.00037624	0.0054128
novel_circ_0014108	36.4241	14.571	1.2654	0.00039059	0.0055994
novel_circ_0005538	1.03021	10.8805	-2.5932	0.00039382	0.0056095
novel_circ_0006723	16.2204	3.30481	2.0375	0.00039406	0.0056095
novel_circ_0010871	22.1832	5.98308	1.7538	0.00039793	0.0056448
novel_circ_0000450	9.95793	0.679152	2.7622	0.0004033	0.0057009
novel_circ_0008071	6.71167	0	3.1399	0.00040683	0.005727
novel_circ_0009623	0	5.90021	-3.158	0.00040796	0.005727
novel_circ_0002970	6.67381	0	3.1336	0.00042002	0.005876
novel_circ_0008175	0	5.96073	-3.1452	0.00043831	0.0061108
novel_circ_0019094	6.85795	0	3.1257	0.00044434	0.0061735
novel_circ_0015894	6.70232	0	3.1211	0.00045068	0.0062403
novel_circ_0004138	0	5.93838	-3.1361	0.00045932	0.0063383
novel_circ_0000048	6.67666	0	3.1143	0.00047012	0.0064653
novel_circ_0009343	31.6639	11.7334	1.3633	0.00047404	0.0064972
novel_circ_0011906	6.51351	0	3.1027	0.00049164	0.0067158
novel_circ_0001892	12.7241	1.75841	2.3396	0.00049341	0.0067173
novel_circ_0018683	2.76616	14.5473	-2.1324	0.0004978	0.0067545
novel_circ_0010313	35.0027	69.5833	-0.9708	0.00050107	0.0067761
novel_circ_0011260	6.50884	0	3.0917	0.00052147	0.0070286
novel_circ_0001679	6.45879	0	3.087	0.00052926	0.00711
novel_circ_0001631	6.51066	0	3.0842	0.0005392	0.0072196
novel_circ_0001186	6.47281	0	3.0686	0.00058428	0.0077974
novel_circ_0011945	6.31718	0	3.0644	0.00059116	0.0078634
novel_circ_0013413	20.9385	44.6173	-1.0603	0.00060119	0.0079707
novel_circ_0020919	6.60507	0	3.0612	0.00061262	0.0080957
novel_circ_0010846	0	5.59089	-3.0634	0.00064903	0.0085491
novel_circ_0016054	1.21902	11.0398	-2.5222	0.00065359	0.0085813
novel_circ_0004589	0	5.45541	-3.0568	0.00066591	0.0087149
novel_circ_0008375	0.914266	9.43937	-2.5947	0.0006736	0.0087871
novel_circ_0009085	6.15403	0	3.0276	0.00070409	0.0091468
novel_circ_0009841	6.14936	0	3.0271	0.00070568	0.0091468
novel_circ_0015268	1.23771	10.5791	-2.4862	0.00071466	0.0092337
novel_circ_0010702	0	5.54619	-3.0426	0.0007184	0.0092525
novel_circ_0010657	4.29746	17.098	-1.8024	0.00073069	0.0093811
novel_circ_0020437	6.25311	0	3.0199	0.00073714	0.009434
novel_circ_0010895	14.1394	2.21903	2.2445	0.00074883	0.0095125
novel_circ_0016020	19.8074	5.22897	1.7702	0.00074839	0.0095125
novel_circ_0016778	110.859	159.688	-0.52091	0.00075031	0.0095125
novel_circ_0003066	45.9927	22.2888	1.0169	0.00075621	0.0095309
novel_circ_0006882	6.09281	0	3.0129	0.00075646	0.0095309
novel_circ_0002939	27.8559	54.6079	-0.94418	0.0007678	0.0096438
novel_circ_0012727	135.797	86.8041	0.64123	0.00077818	0.0097141
novel_circ_0017565	13.6121	1.96094	2.3325	0.00077797	0.0097141
novel_circ_0009136	11.6692	1.01873	2.5908	0.00078694	0.0097933
novel_circ_0002255	6.00775	0	3.0034	0.00078979	0.0097987
novel_circ_0003445	42.5908	73.6049	-0.77437	0.00079605	0.0098463
novel_circ_0004892	6.11618	0	3.0011	0.00080422	0.0098572
novel_circ_0010041	0	5.37253	-3.0184	0.00080229	0.0098572
novel_circ_0012177	21.0171	46.5961	-1.0966	0.00080279	0.0098572
novel_circ_0019652	1.12462	9.80129	-2.4486	0.00080829	0.0098772
novel_circ_0006524	6.16805	0	2.9991	0.00081514	0.009931
novel_circ_0015559	0.618857	8.0508	-2.6817	0.00081976	0.0099574
novel_circ_0012756	6.26713	0	2.998	0.0008245	0.009985
novel_circ_0014291	2.46608	13.4233	-2.1405	0.00082714	0.0099872
novel_circ_0016189	72.6262	41.4911	0.79352	0.00083373	0.010037
novel_circ_0006874	5.95587	0	2.991	0.0008381	0.010054
novel_circ_0008970	5.9512	0	2.9905	0.00084007	0.010054
novel_circ_0002535	0	5.68029	-3.0084	0.00085496	0.010172
novel_circ_0014764	2.4736	13.5141	-2.0802	0.00085349	0.010172
novel_circ_0003484	31.4466	12.0188	1.3379	0.00086153	0.01022
novel_circ_0005774	6.03626	0	2.9755	0.00091018	0.010766
novel_circ_0021294	12.8232	31.0266	-1.2292	0.00091726	0.010818
novel_circ_0006237	18.6019	4.59451	1.8417	0.00092339	0.010859
novel_circ_0002720	18.7772	40.8054	-1.0718	0.00092796	0.010862
novel_circ_0002990	12.9391	2.19529	2.1637	0.000929	0.010862
novel_circ_0008360	5.8446	0	2.965	0.00094214	0.010984
novel_circ_0008719	5.8918	0	2.9647	0.00094656	0.011003
novel_circ_0012731	147.13	100.123	0.55247	0.00095712	0.011094
novel_circ_0018207	5.79273	0	2.9589	0.00096826	0.011192
novel_circ_0012553	17.1173	3.66674	1.9506	0.00098275	0.011327
novel_circ_0007865	21.4466	6.15691	1.6449	0.00099849	0.011443
novel_circ_0017896	5.83526	0	2.9534	0.00099763	0.011443
novel_circ_0013417	0	5.1987	-2.9682	0.0010054	0.011458
novel_circ_0017503	17.0042	3.57734	1.9535	0.0010036	0.011458
novel_circ_0005252	18.3869	4.11293	1.9208	0.00102	0.011591
novel_circ_0018337	0	5.16053	-2.9622	0.0010325	0.011701
novel_circ_0000418	0.515106	7.93114	-2.6699	0.0010427	0.011784
novel_circ_0005383	5.85862	0	2.9419	0.0010567	0.011824
novel_circ_0009971	22.4997	6.9045	1.5724	0.0010508	0.011824
novel_circ_0010888	5.9577	0	2.9429	0.001058	0.011824
novel_circ_0011176	3.79637	15.625	-1.83	0.0010535	0.011824
novel_circ_0020139	0	5.27367	-2.9537	0.0010806	0.012044
novel_circ_0005377	20.7329	6.23187	1.602	0.0010839	0.012047
novel_circ_0006878	5.703	0	2.9295	0.0011128	0.012302
novel_circ_0016142	30.6959	11.5834	1.327	0.0011098	0.012302
novel_circ_0017176	5.64645	0	2.9205	0.0011584	0.01277
novel_circ_0002806	5.97686	0	2.923	0.0011659	0.012784
novel_circ_0021210	1.21902	10.6319	-2.4517	0.0011658	0.012784
novel_circ_0019809	11.7958	29.3274	-1.2502	0.0011853	0.012962
novel_circ_0010795	0	5.07765	-2.9229	0.0012362	0.013481
novel_circ_0001977	48.2157	80.5634	-0.72921	0.001263	0.013724
novel_circ_0007402	65.5363	102.785	-0.64896	0.0012652	0.013724
novel_circ_0013802	5.58238	0	2.8968	0.0012858	0.013911
novel_circ_0001708	1.5378	10.2764	-2.2699	0.0012959	0.013983
novel_circ_0011398	24.3095	8.40481	1.4335	0.0013188	0.014192
novel_circ_0012061	5.5777	0	2.8882	0.0013389	0.01437
novel_circ_0001166	5.5899	0	2.8866	0.0013571	0.014414
novel_circ_0007384	0	5.02504	-2.9031	0.0013505	0.014414
novel_circ_0008183	8.84266	0.784377	2.5534	0.0013572	0.014414
novel_circ_0008439	0	5.02504	-2.9031	0.0013505	0.014414
novel_circ_0010681	5.64827	0	2.8834	0.001375	0.014565
novel_circ_0005718	50.7669	24.3948	1.0099	0.0013864	0.014647
novel_circ_0013159	5.47862	0	2.8754	0.0014144	0.014866
novel_circ_0013900	38.0942	17.5875	1.0741	0.0014137	0.014866
novel_circ_0010665	27.7166	52.2203	-0.89348	0.0014315	0.015007
novel_circ_0005436	17.6638	37.7336	-1.0599	0.0014376	0.015032
novel_circ_0004073	22.5235	7.68888	1.4483	0.0014749	0.015264
novel_circ_0009455	28.2247	11.091	1.2915	0.0014693	0.015264
novel_circ_0019526	7.63528	22.6679	-1.4751	0.0014717	0.015264
novel_circ_0020007	2.25858	11.7781	-2.0229	0.0014693	0.015264
novel_circ_0017729	6.40691	19.9644	-1.5211	0.0014873	0.015354
novel_circ_0001426	5.58522	0	2.8619	0.0015221	0.015642
novel_circ_0016115	5.55387	0	2.8604	0.001523	0.015642
novel_circ_0016484	29.8522	11.869	1.2544	0.0015432	0.01581
novel_circ_0007764	38.2428	17.0691	1.1121	0.0015649	0.015912
novel_circ_0007854	18.9679	5.46984	1.6312	0.001559	0.015912
novel_circ_0008779	0	4.82887	-2.8672	0.0015639	0.015912
novel_circ_0007164	5.42675	0	2.8516	0.0015762	0.015977
novel_circ_0017632	14.9093	3.31925	1.8992	0.0015832	0.015977
novel_circ_0018048	0	4.77625	-2.8646	0.0015792	0.015977
novel_circ_0004834	61.4938	99.4153	-0.6756	0.0016171	0.016239
novel_circ_0018300	18.5355	4.83539	1.7507	0.0016149	0.016239
novel_circ_0010897	5.65762	0	2.8476	0.0016239	0.016267
novel_circ_0002254	5.37955	0	2.843	0.0016358	0.016346
novel_circ_0006717	13.0382	2.53487	2.0099	0.0016428	0.016346
novel_circ_0013605	0.515106	7.33347	-2.5749	0.0016519	0.016346
novel_circ_0013779	1.03021	9.4538	-2.3818	0.001647	0.016346
novel_circ_0018213	14.4844	3.09281	1.9686	0.0016519	0.016346
novel_circ_0007533	0.515106	7.35721	-2.5737	0.0016811	0.016594
novel_circ_0006782	0	4.85913	-2.8502	0.0016886	0.016628
novel_circ_0015544	2.81154	13.6721	-1.96	0.0016941	0.016642
novel_circ_0018312	53.5569	28.3274	0.89159	0.0017203	0.016859
novel_circ_0009312	5.28229	0	2.8287	0.0017288	0.016901
novel_circ_0009449	5.27762	0	2.828	0.0017336	0.016907
novel_circ_0001257	5.3295	0	2.8276	0.0017414	0.016942
novel_circ_0007124	5.32482	0	2.8245	0.0017662	0.017143
novel_circ_0007758	0	4.69338	-2.8373	0.0017761	0.017197
novel_circ_0008178	5.27295	0	2.8216	0.0017851	0.017241
novel_circ_0009344	5.22575	0	2.8205	0.0017891	0.017241
novel_circ_0004205	12.5731	30.1003	-1.1997	0.0018105	0.017405
novel_circ_0017293	7.75874	23.0731	-1.4381	0.0018194	0.01745
novel_circ_0005985	5.3767	0	2.8179	0.0018243	0.017455
novel_circ_0019554	5.32015	0	2.8161	0.0018344	0.017511
novel_circ_0016905	5.17854	0	2.8136	0.001842	0.017542
novel_circ_0003868	0	4.73808	-2.8277	0.001855	0.017625
novel_circ_0001288	12.1431	2.24791	2.0625	0.0018696	0.017721
novel_circ_0002455	0.914266	8.36011	-2.4202	0.00189	0.017855
novel_circ_0006421	5.26827	0	2.8086	0.0018924	0.017855
novel_circ_0004303	8.10318	0.679152	2.4865	0.0019047	0.017929
novel_circ_0016628	25.2604	8.65344	1.4639	0.0019419	0.018237
novel_circ_0004630	0	4.67103	-2.8149	0.0019561	0.018244
novel_circ_0007727	15.0589	3.17724	1.9245	0.0019523	0.018244
novel_circ_0019150	5.13134	0	2.8006	0.0019484	0.018244
novel_circ_0001480	1.21902	9.72478	-2.339	0.0019644	0.018279
novel_circ_0020087	8.2238	0.679152	2.4904	0.0019911	0.018485
novel_circ_0011345	26.6589	9.22892	1.4127	0.002005	0.018571
novel_circ_0019870	24.6452	47.3612	-0.91505	0.0020195	0.018663
novel_circ_0006876	5.24261	0	2.7897	0.002065	0.01904
novel_circ_0016711	5.2636	0	2.7879	0.0020752	0.01909
novel_circ_0000333	8.31536	0.679152	2.4833	0.0021035	0.019285
novel_circ_0007228	12.6157	2.21903	2.0893	0.0021058	0.019285
novel_circ_0007118	11.5504	1.69788	2.1833	0.0021132	0.019309
novel_circ_0003937	8.21628	0.739678	2.4665	0.0021427	0.019404
novel_circ_0004843	12.7526	2.21903	2.095	0.0021299	0.019404
novel_circ_0007267	1.84722	11.4701	-2.1761	0.0021359	0.019404
novel_circ_0015745	60.6088	32.473	0.87473	0.0021407	0.019404
novel_circ_0001741	1.9585	11.0081	-2.0599	0.0021506	0.019432
novel_circ_0019308	139.682	98.4956	0.50046	0.002205	0.019879
novel_circ_0018672	1.99168	11.4913	-2.0917	0.0022302	0.020062
novel_circ_0006228	5.40007	0	2.7712	0.0022454	0.020154
novel_circ_0003061	14.9972	3.26803	1.8957	0.0022788	0.020408
novel_circ_0020171	0	4.6105	-2.7765	0.002299	0.020544
novel_circ_0003895	4.97287	0	2.7517	0.0023885	0.021263
novel_circ_0004407	5.02007	0	2.7515	0.0023951	0.021263
novel_circ_0008841	5.02007	0	2.7515	0.0023951	0.021263
novel_circ_0002205	14.5433	3.66674	1.7593	0.0024301	0.021526
novel_circ_0000668	4.92566	0	2.7439	0.0024648	0.021691
novel_circ_0007902	4.92566	0	2.7439	0.0024648	0.021691
novel_circ_0014691	5.07194	0	2.7459	0.0024596	0.021691
novel_circ_0015409	4.92099	0	2.7432	0.0024724	0.021711
novel_circ_0004468	15.3318	3.5536	1.8182	0.0024841	0.021748
novel_circ_0006284	16.5018	4.82887	1.6167	0.0024927	0.021748
novel_circ_0015516	13.1331	32.1267	-1.2271	0.002491	0.021748
novel_circ_0015412	21.1395	6.35447	1.5601	0.002509	0.021844
novel_circ_0001944	48.9057	78.3653	-0.66414	0.0025171	0.021867
novel_circ_0010925	0	4.99617	-2.7569	0.002532	0.021949
novel_circ_0004430	41.1563	20.7121	0.95612	0.002551	0.022034
novel_circ_0013626	27.409	11.0766	1.2407	0.0025581	0.022034
novel_circ_0013873	36.539	63.8486	-0.79979	0.002558	0.022034
novel_circ_0001296	6.35503	19.1894	-1.4767	0.0026223	0.022256
novel_circ_0003266	9.37408	24.009	-1.2917	0.0026081	0.022256
novel_circ_0005990	16.9557	4.54982	1.7174	0.002616	0.022256
novel_circ_0009371	71.4858	109.61	-0.60888	0.0025959	0.022256
novel_circ_0016288	0	4.43668	-2.7448	0.0025945	0.022256
novel_circ_0018385	0	4.48138	-2.7428	0.0026202	0.022256
novel_circ_0021612	10.043	25.2908	-1.2551	0.0026117	0.022256
novel_circ_0013837	4.98039	0	2.7286	0.0026499	0.022397
novel_circ_0016440	2.97651	12.427	-1.8246	0.0026454	0.022397
novel_circ_0006235	112.515	75.2777	0.57287	0.0026749	0.022562
novel_circ_0002804	5.82774	0	2.731	0.0027127	0.022785
novel_circ_0011193	0.515106	6.88215	-2.4824	0.0027091	0.022785
novel_circ_0003100	5.11447	0	2.7225	0.0027236	0.02283
novel_circ_0000103	4.95885	0	2.7175	0.0027643	0.023091
novel_circ_0013549	5.5305	17.8966	-1.545	0.0027662	0.023091
novel_circ_0005787	85.6019	123.853	-0.52439	0.0027759	0.023125
novel_circ_0005533	0	4.3538	-2.7267	0.0027879	0.023177
novel_circ_0017161	41.9668	21.7228	0.92885	0.0027979	0.023213
novel_circ_0021093	1.42937	9.56833	-2.1735	0.0028609	0.023687
novel_circ_0007216	0.60951	7.06886	-2.456	0.0029606	0.024463
novel_circ_0000710	0	4.32354	-2.708	0.0030051	0.02478
novel_circ_0009670	9.02964	1.17657	2.2777	0.0030225	0.024873
novel_circ_0018386	0.928286	8.01262	-2.3393	0.0030308	0.024891
novel_circ_0002438	55.0698	28.2445	0.92137	0.0030665	0.025133
novel_circ_0009514	54.8649	29.697	0.87719	0.0031282	0.025587
novel_circ_0001118	46.361	75.2215	-0.69277	0.0031671	0.025853
novel_circ_0003565	2.91996	12.1321	-1.7979	0.0032234	0.02626
novel_circ_0014137	41.9009	21.9492	0.90823	0.0032889	0.026739
novel_circ_0017217	45.5878	24.4775	0.86911	0.0033061	0.026826
novel_circ_0014533	4.71999	0	2.6674	0.0033595	0.027205
novel_circ_0015438	4.66344	0	2.6647	0.0033905	0.027401
novel_circ_0015632	0	4.29328	-2.6747	0.0034292	0.027658
novel_circ_0003104	8.77209	1.10952	2.2566	0.0034379	0.027673
novel_circ_0020108	20.0593	6.98737	1.4086	0.0034924	0.028057
novel_circ_0001516	0.618857	6.63197	-2.4051	0.0035192	0.028216
novel_circ_0000894	85.0237	122.659	-0.52032	0.0035657	0.028476
novel_circ_0010442	16.1329	4.7986	1.5799	0.003564	0.028476
novel_circ_0007295	27.9218	11.9359	1.1789	0.0036214	0.028865
novel_circ_0017215	29.4783	12.902	1.14	0.0036776	0.029255
novel_circ_0012067	7.44179	0.784377	2.3456	0.0037059	0.029423
novel_circ_0011264	7.72318	0.679152	2.3773	0.00374	0.029635
novel_circ_0008217	4.56436	0	2.6379	0.0037674	0.029736
novel_circ_0011943	4.65409	0	2.6388	0.0037654	0.029736
novel_circ_0015217	4.56436	15.1802	-1.5548	0.0038137	0.029984
novel_circ_0016580	4.60689	0	2.6353	0.0038119	0.029984
novel_circ_0018016	5.50896	0	2.6411	0.0038511	0.03022
novel_circ_0012129	5.86147	17.9126	-1.4562	0.0038753	0.030329
novel_circ_0020385	4.67563	0	2.6324	0.0038799	0.030329
novel_circ_0005364	8.72489	1.17657	2.2294	0.0039158	0.03055
novel_circ_0012875	57.229	32.6688	0.80351	0.0039323	0.030621
novel_circ_0001469	27.7731	49.3855	-0.8123	0.0039737	0.030884
novel_circ_0016018	12.3884	2.63357	1.8981	0.0039961	0.030999
novel_circ_0000018	10.0995	1.80311	2.015	0.0040267	0.031176
novel_circ_0009826	4.51716	0	2.6181	0.0040714	0.031458
novel_circ_0017626	23.8538	8.43663	1.3642	0.0040785	0.031458
novel_circ_0014833	29.2637	51.2269	-0.79567	0.0040998	0.031561
novel_circ_0014961	30.2439	13.6785	1.0976	0.0041171	0.031635
novel_circ_0009644	4.52183	0	2.6126	0.0041618	0.031918
novel_circ_0012211	58.5513	88.3786	-0.58433	0.0041706	0.031925
novel_circ_0020094	18.9754	6.6925	1.4018	0.0041786	0.031926
novel_circ_0006871	0	4.08919	-2.6136	0.0043062	0.032839
novel_circ_0019265	48.9659	26.569	0.85238	0.0043165	0.032855
novel_circ_0002921	4.55501	0	2.6009	0.0043631	0.033123
novel_circ_0020521	0	4.11945	-2.61	0.004368	0.033123
novel_circ_0000774	8.0041	21.0501	-1.2925	0.0044703	0.033773
novel_circ_0012451	0	4.1418	-2.604	0.0044702	0.033773
novel_circ_0001583	29.5213	12.9036	1.1194	0.0045757	0.034058
novel_circ_0002748	210.577	269.114	-0.35238	0.0045745	0.034058
novel_circ_0006180	4.46528	0	2.5889	0.0045596	0.034058
novel_circ_0007310	0	4.05892	-2.5949	0.0046171	0.034058
novel_circ_0009131	4.46995	0	2.5898	0.0045432	0.034058
novel_circ_0011132	0	4.05892	-2.5949	0.0046171	0.034058
novel_circ_0012326	0	4.05892	-2.5949	0.0046171	0.034058
novel_circ_0013513	9.29471	25.7277	-1.3332	0.004614	0.034058
novel_circ_0014091	0	4.05892	-2.5949	0.0046171	0.034058
novel_circ_0015895	4.46995	0	2.5898	0.0045432	0.034058
novel_circ_0016439	0	4.05892	-2.5949	0.0046171	0.034058
novel_circ_0018076	0.515106	6.26213	-2.3643	0.0045919	0.034058
novel_circ_0018619	22.8835	44.6382	-0.93081	0.0045864	0.034058
novel_circ_0013139	7.24079	0.784377	2.3	0.0046539	0.034266
novel_circ_0001639	11.7743	2.46782	1.8649	0.0047548	0.034757
novel_circ_0004433	0.515106	6.19508	-2.3566	0.0047399	0.034757
novel_circ_0010853	0.515106	6.37527	-2.3637	0.0047547	0.034757
novel_circ_0018943	0.515106	6.37527	-2.3637	0.0047547	0.034757
novel_circ_0016141	4.40588	0	2.5761	0.0047667	0.034782
novel_circ_0003878	0	4.16415	-2.5841	0.0048187	0.035035
novel_circ_0006000	4.46243	0	2.5741	0.004813	0.035035
novel_circ_0001754	23.312	8.93249	1.2993	0.0048665	0.03513
novel_circ_0003651	4.35868	0	2.5704	0.0048654	0.03513
novel_circ_0009066	4.45309	0	2.5722	0.0048475	0.03513
novel_circ_0016244	4.35868	0	2.5704	0.0048654	0.03513
novel_circ_0021402	9.71439	1.56875	2.1011	0.0048846	0.035199
novel_circ_0003206	1.44339	8.72204	-2.0616	0.0049066	0.035257
novel_circ_0018467	8.98711	23.427	-1.2688	0.0049101	0.035257
novel_circ_0005759	0.772658	7.35582	-2.2661	0.0049194	0.035261
novel_circ_0016493	4.35401	0	2.5651	0.0049664	0.035535
novel_circ_0007766	4.46711	0	2.5653	0.0049803	0.035572
novel_circ_0001401	19.1764	6.95711	1.3565	0.0050518	0.03602
novel_circ_0007721	10.9778	2.12825	1.9222	0.0051348	0.036389
novel_circ_0013210	4.30681	0	2.5548	0.0051577	0.036389
novel_circ_0013385	4.4199	0	2.5553	0.0051665	0.036389
novel_circ_0013412	4.4199	0	2.5553	0.0051665	0.036389
novel_circ_0016557	6.64815	21.0452	-1.489	0.0051448	0.036389
novel_circ_0019181	4.31148	0	2.5558	0.0051387	0.036389
novel_circ_0019717	1.03021	8.14159	-2.1721	0.0051186	0.036389
novel_circ_0006232	12.5465	2.94289	1.789	0.0052062	0.036606
novel_circ_0007167	1.9585	9.98939	-1.9194	0.0052156	0.036609
novel_circ_0007223	1.13396	7.74149	-2.1182	0.0052824	0.037013
novel_circ_0018050	3.84825	13.5748	-1.6352	0.0053022	0.037088
novel_circ_0014539	4.41341	0	2.5479	0.005326	0.03719
novel_circ_0006230	17.8881	5.74237	1.474	0.0053548	0.037327
novel_circ_0010339	119.643	162.53	-0.4366	0.0053697	0.037367
novel_circ_0020262	30.2888	13.1876	1.1382	0.0053985	0.037503
novel_circ_0006830	0	3.93135	-2.5508	0.0054224	0.037541
novel_circ_0006956	0	3.93135	-2.5508	0.0054224	0.037541
novel_circ_0021256	0.60951	6.22535	-2.3148	0.005474	0.037833
novel_circ_0012626	37.3244	19.3156	0.91462	0.0054953	0.037916
novel_circ_0012477	4.2596	0	2.5368	0.0055152	0.037989
novel_circ_0017885	2.91996	11.2727	-1.7046	0.0057325	0.039418
novel_circ_0015964	90.4246	125.45	-0.47283	0.005817	0.039864
novel_circ_0016248	6.92202	0.784377	2.2488	0.0058151	0.039864
novel_circ_0013075	4.39186	0	2.5217	0.0058577	0.040075
novel_circ_0013872	22.5596	43.4483	-0.90568	0.0058857	0.040199
novel_circ_0014732	23.9324	46.0524	-0.89987	0.005908	0.040216
novel_circ_0019849	23.2368	9.3852	1.2405	0.0059049	0.040216
novel_circ_0004625	4.87379	15.6504	-1.5207	0.0059356	0.040336
novel_circ_0011875	6.91267	0.739678	2.2477	0.0061045	0.041415
novel_circ_0001361	107.844	71.6111	0.58323	0.0061481	0.041436
novel_circ_0003762	9.22312	1.56875	2.0439	0.0061376	0.041436
novel_circ_0009152	28.786	50.7172	-0.8017	0.0061587	0.041436
novel_circ_0014372	16.1498	4.9867	1.5486	0.006154	0.041436
novel_circ_0019743	0	3.90109	-2.5169	0.0061249	0.041436
novel_circ_0016811	8.76457	1.52405	2.0136	0.0062765	0.042159
novel_circ_0002510	2.97469	12.5559	-1.7385	0.0063204	0.042383
novel_circ_0008463	34.7779	17.9205	0.92442	0.0063454	0.042481
novel_circ_0001209	7.20111	0.784377	2.2542	0.0063577	0.042493
novel_circ_0019801	3.19438	13.1587	-1.7124	0.0063929	0.042658
novel_circ_0016234	0.515106	5.95282	-2.29	0.0064343	0.042863
novel_circ_0011417	4.21708	0	2.494	0.0064588	0.042886
novel_circ_0018152	4.21708	0	2.494	0.0064588	0.042886
novel_circ_0002811	4.20306	0	2.4909	0.0065307	0.043293
novel_circ_0018572	14.0749	4.08919	1.5845	0.0065754	0.043518
novel_circ_0019622	3.14433	12.5337	-1.7194	0.0066045	0.043639
novel_circ_0007399	7.90035	20.2513	-1.2481	0.0067142	0.04422
novel_circ_0014076	5.96055	17.4202	-1.3971	0.0067051	0.04422
novel_circ_0007156	0.772658	7.06886	-2.2019	0.0067537	0.044408
novel_circ_0001644	4.15301	0	2.4776	0.0068287	0.044644
novel_circ_0005554	4.15301	0	2.4776	0.0068287	0.044644
novel_circ_0014820	35.515	18.3956	0.91939	0.0068335	0.044644
novel_circ_0015548	13.7206	30.0016	-1.0953	0.006821	0.044644
novel_circ_0005629	8.37658	1.01873	2.1552	0.0068972	0.044915
novel_circ_0020562	1.38217	8.25489	-2.0055	0.0068973	0.044915
novel_circ_0006099	26.4125	45.8607	-0.77138	0.0069837	0.04527
novel_circ_0012019	4.15768	0	2.4714	0.0069852	0.04527
novel_circ_0015658	4.15768	0	2.4714	0.0069852	0.04527
novel_circ_0012978	64.1529	94.2448	-0.54729	0.0070064	0.045335
novel_circ_0010919	18.543	6.39126	1.3862	0.0070333	0.045364
novel_circ_0013042	13.7659	4.03658	1.565	0.0070315	0.045364
novel_circ_0004215	4.05393	0	2.465	0.0071306	0.045701
novel_circ_0007049	0	4.22467	-2.4756	0.0071049	0.045701
novel_circ_0012669	4.05393	0	2.465	0.0071306	0.045701
novel_circ_0018929	4.05393	0	2.465	0.0071306	0.045701
novel_circ_0013657	4.04925	0	2.4639	0.0071581	0.045733
novel_circ_0017994	4.04925	0	2.4639	0.0071581	0.045733
novel_circ_0007426	13.178	3.57734	1.6286	0.0071807	0.045805
novel_circ_0015095	10.7249	2.14268	1.8761	0.0072074	0.045903
novel_circ_0001214	10.9287	2.53487	1.772	0.007248	0.046089
novel_circ_0012298	0	3.697	-2.4663	0.007278	0.046208
novel_circ_0003430	34.1015	17.0295	0.95153	0.0073072	0.04625
novel_circ_0011317	35.8745	18.6299	0.91298	0.0073119	0.04625
novel_circ_0020565	58.6771	35.317	0.72379	0.0073189	0.04625
novel_circ_0004602	2.24923	10.7083	-1.8517	0.0073539	0.046321
novel_circ_0012300	0	3.74961	-2.4635	0.0073549	0.046321
novel_circ_0019977	4.16235	0	2.4567	0.0073643	0.046321
novel_circ_0005091	2.61521	10.7975	-1.7395	0.0073925	0.046354
novel_circ_0014071	4.0586	0	2.4554	0.0073827	0.046354
novel_circ_0013261	0	3.67465	-2.46	0.0074373	0.046492
novel_circ_0016481	31.4466	15.4816	0.98548	0.0074371	0.046492
novel_circ_0009976	4.13899	0	2.4513	0.0075028	0.046757
novel_circ_0015356	6.90332	0.739678	2.2148	0.0075016	0.046757
novel_circ_0008950	2.25858	9.77894	-1.7712	0.0075659	0.047078
novel_circ_0001412	0	3.64439	-2.4512	0.0076633	0.047611
novel_circ_0008224	0	3.70491	-2.4509	0.0076754	0.047613
novel_circ_0007723	3.99738	0	2.4406	0.0077714	0.048135
novel_circ_0013197	58.2587	35.2001	0.71279	0.0077976	0.048224
novel_circ_0008340	0.772658	6.63988	-2.1509	0.0078912	0.048654
novel_circ_0014323	14.5176	4.28675	1.5451	0.0078817	0.048654
novel_circ_0000352	0	4.10362	-2.4427	0.0079367	0.048861
novel_circ_0016361	29.1711	14.026	1.011	0.007972	0.049004
novel_circ_0000059	4.06327	0	2.4326	0.0080038	0.049125
novel_circ_0011620	0.928286	7.15965	-2.1483	0.0080242	0.049175
novel_circ_0021614	5.56836	16.2307	-1.4154	0.0080669	0.049363
novel_circ_0013627	4.08711	0	2.429	0.0081096	0.049549
novel_circ_0009482	4.03991	0	2.427	0.008158	0.04977
novel_circ_0006012	11.1251	2.70062	1.7598	0.0081731	0.049787
novel_circ_0002248	3.95018	0	2.4214	0.0083038	0.049909
novel_circ_0003231	4.13431	0	2.423	0.0082894	0.049909
novel_circ_0006511	13.5504	4.06684	1.5375	0.0082764	0.049909
novel_circ_0009590	0.515106	5.73446	-2.2379	0.0082769	0.049909
novel_circ_0012412	3.95485	0	2.4226	0.0082712	0.049909
novel_circ_0015007	3.95018	0	2.4214	0.0083038	0.049909
novel_circ_0015656	4.0114	0	2.4231	0.0082672	0.049909
novel_circ_0017117	4.0114	0	2.4231	0.0082672	0.049909
novel_circ_0021014	3.95485	0	2.4226	0.0082712	0.049909
Differentially expressed circRNAs between 6hpi and 0hpi
ID	T_6h_readcount	T_0h_readcount	log2FoldChange	pval	padj
novel_circ_0018388	6.44941	403.949	-5.8603	1.28e-77	5.24e-74
novel_circ_0021339	464.526	0.708581	8.0549	2.89e-37	5.91e-34
novel_circ_0000958	260.587	58.2711	2.1441	4.87e-31	6.64e-28
novel_circ_0000056	2.20388	86.7777	-4.989	6.2e-24	6.34e-21
novel_circ_0000698	154.024	404.291	-1.3777	6.36e-21	5.2e-18
novel_circ_0002238	6.80503	64.8639	-3.1815	2.05e-17	1.25e-14
novel_circ_0019930	446.436	182.04	1.2929	2.14e-17	1.25e-14
novel_circ_0001549	297.363	120.08	1.304	1.28e-16	6.52e-14
novel_circ_0013576	15.5986	86.4886	-2.3871	2.22e-16	1.01e-13
novel_circ_0000605	78.901	12.4549	2.5909	5.33e-15	2.18e-12
novel_circ_0020833	59.9082	1.41716	4.7727	8.91e-15	3.31e-12
novel_circ_0009418	101.275	21.9907	2.1918	1.29e-14	4.41e-12
novel_circ_0003348	72.906	0	6.4949	2.16e-14	6.8e-12
novel_circ_0006490	56.1429	1.85206	4.4392	4.84e-14	1.41e-11
novel_circ_0007864	52.0559	3.75255	3.5472	6.51e-13	1.77e-10
novel_circ_0017899	21.1875	92.0066	-2.0715	7.14e-13	1.83e-10
novel_circ_0017898	52.0584	150.038	-1.4937	1.08e-12	2.59e-10
novel_circ_0000781	105.406	242.085	-1.1831	1.37e-12	2.95e-10
novel_circ_0012170	30.4302	98.4122	-1.691	1.35e-12	2.95e-10
novel_circ_0018493	7.91251	51.523	-2.6425	1.88e-12	3.83e-10
novel_circ_0017643	80.6297	15.2743	2.3668	2.93e-12	5.7e-10
novel_circ_0018338	0	34.3369	-5.9301	1.97e-11	3.66e-09
novel_circ_0005436	4.15345	39.5455	-3.0953	2.79e-11	4.95e-09
novel_circ_0000894	50.3129	128.353	-1.3505	4.09e-11	6.96e-09
novel_circ_0014672	528.176	295.317	0.8349	6.2e-11	1.01e-08
novel_circ_0011281	108.937	32.3841	1.737	9.27e-11	1.46e-08
novel_circ_0012175	59.8081	150.4	-1.3407	1.08e-10	1.63e-08
novel_circ_0011549	5.07101	41.4985	-2.9697	1.22e-10	1.72e-08
novel_circ_0016023	108.493	35.7828	1.5977	1.18e-10	1.72e-08
novel_circ_0007574	41.3899	0	5.7191	1.65e-10	2.25e-08
novel_circ_0016980	33.8373	0	5.5459	6.6e-10	8.7e-08
novel_circ_0012618	33.1369	1.06287	4.1983	1.84e-09	2.35e-07
novel_circ_0005121	30.801	0	5.4339	1.97e-09	2.44e-07
novel_circ_0000917	49.9358	8.89589	2.42	2.76e-09	3.32e-07
novel_circ_0014419	0	22.3445	-5.3734	4.43e-09	5.17e-07
novel_circ_0000714	0.493853	24.2939	-4.4977	5.15e-09	5.52e-07
novel_circ_0000783	2.20019	27.8959	-3.3669	4.94e-09	5.52e-07
novel_circ_0007402	36.2766	107.5	-1.5877	5.22e-09	5.52e-07
novel_circ_0018123	0	22.2644	-5.3566	5.27e-09	5.52e-07
novel_circ_0003692	34.3388	2.91493	3.246	5.68e-09	5.8e-07
novel_circ_0007865	40.8784	6.45303	2.5394	6.51e-09	6.49e-07
novel_circ_0012973	30.2647	91.4719	-1.554	8.45e-09	8.22e-07
novel_circ_0004188	0	20.8031	-5.2807	1.02e-08	9.72e-07
novel_circ_0002588	26.2456	0	5.2384	1.05e-08	9.74e-07
novel_circ_0018723	15.9044	57.9168	-1.8047	1.17e-08	1.06e-06
novel_circ_0018671	7.37273	40.6628	-2.3247	1.49e-08	1.32e-06
novel_circ_0002263	25.0848	0	5.1791	1.79e-08	1.53e-06
novel_circ_0012171	51.4501	118.189	-1.1871	1.76e-08	1.53e-06
novel_circ_0015739	44.2212	9.37393	2.1819	3.44e-08	2.87e-06
novel_circ_0010430	1.48525	23.9068	-3.4937	3.51e-08	2.87e-06
novel_circ_0003337	36.1665	5.42781	2.6033	3.91e-08	3.13e-06
novel_circ_0005183	24.6352	0.837627	4.1393	5.97e-08	4.69e-06
novel_circ_0011161	27.5247	1.4709	3.6811	6.79e-08	5.24e-06
novel_circ_0009223	17.4707	57.1444	-1.6623	7.41e-08	5.61e-06
novel_circ_0007219	22.103	0	5.0015	7.62e-08	5.67e-06
novel_circ_0005742	4.2603	28.9259	-2.6405	1.02e-07	7.44e-06
novel_circ_0010699	9.74416	41.3652	-2.0281	1.09e-07	7.81e-06
novel_circ_0000649	40.0862	94.6706	-1.2173	1.25e-07	8.82e-06
novel_circ_0000906	31.6632	4.57939	2.6298	1.5e-07	1.03e-05
novel_circ_0011698	0	16.5401	-4.959	1.51e-07	1.03e-05
novel_circ_0010883	53.9951	14.0877	1.9091	1.72e-07	1.15e-05
novel_circ_0004432	1.48156	22.4997	-3.4007	1.8e-07	1.19e-05
novel_circ_0008379	0	15.4134	-4.895	2.25e-07	1.46e-05
novel_circ_0019731	8.0856	39.3951	-2.2553	2.31e-07	1.47e-05
novel_circ_0018683	0	15.2414	-4.8824	2.49e-07	1.57e-05
novel_circ_0009390	83.7179	33.5758	1.3134	3.01e-07	1.86e-05
novel_circ_0017651	8.7583	36.9465	-2.0295	3.26e-07	1.99e-05
novel_circ_0006260	0	14.4038	-4.807	4.39e-07	2.64e-05
novel_circ_0009839	18.4563	0	4.7659	4.65e-07	2.76e-05
novel_circ_0006360	38.8331	8.86373	2.0592	4.89e-07	2.86e-05
novel_circ_0008928	10.6783	39.8998	-1.8818	5.49e-07	3.16e-05
novel_circ_0002710	0.711245	16.9268	-3.9708	6e-07	3.41e-05
novel_circ_0015426	102.663	47.2435	1.1071	6.34e-07	3.55e-05
novel_circ_0018365	0.740779	17.9897	-3.7683	6.55e-07	3.62e-05
novel_circ_0016037	17.2219	0	4.706	6.99e-07	3.81e-05
novel_circ_0009974	309.871	172.314	0.84626	7.15e-07	3.85e-05
novel_circ_0013236	30.8112	84.6361	-1.4764	7.26e-07	3.85e-05
novel_circ_0019131	45.7156	100.295	-1.1201	7.77e-07	4.07e-05
novel_circ_0019276	112.585	53.0848	1.0652	8.08e-07	4.18e-05
novel_circ_0015745	84.5912	34.1179	1.2957	8.99e-07	4.59e-05
novel_circ_0002903	4.14607	25.7857	-2.4832	9.48e-07	4.76e-05
novel_circ_0004093	4.49984	27.0307	-2.4602	9.55e-07	4.76e-05
novel_circ_0014781	64.474	22.9939	1.4563	9.99e-07	4.86e-05
novel_circ_0019952	0	13.3249	-4.695	9.94e-07	4.86e-05
novel_circ_0014707	16.3062	0	4.6407	1.12e-06	5.38e-05
novel_circ_0015516	7.47588	33.7048	-2.0532	1.17e-06	5.55e-05
novel_circ_0017215	46.0731	13.5345	1.7297	1.22e-06	5.75e-05
novel_circ_0002510	0	13.121	-4.6639	1.25e-06	5.8e-05
novel_circ_0010892	70.9444	26.6071	1.4045	1.33e-06	6.11e-05
novel_circ_0020565	91.3339	37.1194	1.2918	1.43e-06	6.49e-05
novel_circ_0019696	200.39	324.647	-0.69371	1.51e-06	6.79e-05
novel_circ_0001288	23.1904	2.38383	3.0044	1.6e-06	6.97e-05
novel_circ_0003719	19.7703	57.0259	-1.4908	1.6e-06	6.97e-05
novel_circ_0016027	23.8019	2.31931	3.0275	1.6e-06	6.97e-05
novel_circ_0007782	5.92972	29.7532	-2.269	1.73e-06	7.28e-05
novel_circ_0013534	76.3078	30.355	1.3154	1.69e-06	7.28e-05
novel_circ_0017149	65.8475	23.8368	1.4514	1.72e-06	7.28e-05
novel_circ_0008918	0	12.4556	-4.5943	2e-06	8.33e-05
novel_circ_0014513	18.3903	0.762317	3.7454	2.28e-06	9.41e-05
novel_circ_0003066	60.8054	23.3481	1.3568	2.54e-06	0.00010388
novel_circ_0000172	91.963	183.265	-0.99706	2.61e-06	0.00010576
novel_circ_0010051	2.73096	48.4164	-3.5054	2.7e-06	0.00010829
novel_circ_0021314	15.1505	0	4.5117	2.73e-06	0.00010838
novel_circ_0003766	29.4423	3.51123	2.807	2.76e-06	0.0001086
novel_circ_0015661	64.4207	25.0927	1.3294	2.85e-06	0.00011022
novel_circ_0018384	0	12.5038	-4.552	2.86e-06	0.00011022
novel_circ_0015427	32.7928	7.18847	2.0881	2.89e-06	0.00011045
novel_circ_0011601	61.915	122.522	-0.96503	3.13e-06	0.00011849
novel_circ_0015267	10.8535	37.5212	-1.7432	3.17e-06	0.00011884
novel_circ_0006644	15.552	0	4.4908	3.39e-06	0.00012612
novel_circ_0008380	0	11.7362	-4.5096	3.53e-06	0.00012887
novel_circ_0011695	0	11.6609	-4.5073	3.56e-06	0.00012887
novel_circ_0018623	0	11.5534	-4.5066	3.53e-06	0.00012887
novel_circ_0004741	2.54843	21.3462	-2.8158	3.7e-06	0.00013279
novel_circ_0020837	13.7908	0	4.426	4.64e-06	0.000165
novel_circ_0012556	0.497545	14.0119	-3.7542	4.69e-06	0.00016512
novel_circ_0012402	17.1852	0.708581	3.6589	5.11e-06	0.00017859
novel_circ_0019265	67.6234	27.7285	1.2577	5.33e-06	0.00018481
novel_circ_0006151	0.493853	13.8672	-3.7329	5.63e-06	0.00019346
novel_circ_0001401	31.5471	7.26908	2.0276	6.01e-06	0.00020458
novel_circ_0006066	264.242	153.483	0.77316	6.3e-06	0.0002128
novel_circ_0001708	0	10.7803	-4.4148	6.36e-06	0.00021326
novel_circ_0015031	21.2814	2.38383	2.8823	6.45e-06	0.00021446
novel_circ_0021210	0	11.1125	-4.413	6.96e-06	0.00022944
novel_circ_0000957	32.277	6.51206	2.1977	7.12e-06	0.00023294
novel_circ_0000936	0	10.9146	-4.3995	7.27e-06	0.00023534
novel_circ_0016004	21.7734	56.7198	-1.3443	7.31e-06	0.00023534
novel_circ_0003691	16.5125	0.837627	3.5846	7.45e-06	0.0002379
novel_circ_0006544	0.740779	14.506	-3.468	8.23e-06	0.00026093
novel_circ_0008220	62.8095	21.9519	1.4549	8.89e-06	0.0002796
novel_circ_0016551	12.7608	0	4.3242	9.04e-06	0.00028125
novel_circ_0018394	33.9573	8.32666	1.9348	9.15e-06	0.00028125
novel_circ_0020072	20.1003	1.77145	3.0253	9.09e-06	0.00028125
novel_circ_0007575	12.663	0	4.3084	9.76e-06	0.00029305
novel_circ_0007647	34.0718	8.87981	1.8809	1e-05	0.00029305
novel_circ_0012925	12.8049	40.9046	-1.6259	9.83e-06	0.00029305
novel_circ_0014380	61.5686	23.4014	1.3625	1e-05	0.00029305
novel_circ_0015548	7.84421	31.3575	-1.987	9.78e-06	0.00029305
novel_circ_0015964	73.8367	131.289	-0.83496	1e-05	0.00029305
novel_circ_0019652	0	10.2701	-4.3486	9.69e-06	0.00029305
novel_circ_0013873	28.9819	66.8709	-1.2051	1.09e-05	0.00031243
novel_circ_0014758	0.740779	14.114	-3.4318	1.09e-05	0.00031243
novel_circ_0008970	12.5229	0	4.2871	1.12e-05	0.00031975
novel_circ_0001968	0	10.0072	-4.3148	1.18e-05	0.00033315
novel_circ_0011694	0	10.1363	-4.3177	1.17e-05	0.00033315
novel_circ_0004336	12.2374	0	4.2689	1.26e-05	0.00035186
novel_circ_0000124	3.40713	20.7175	-2.4419	1.28e-05	0.00035332
novel_circ_0012338	101.705	50.5086	1.0138	1.28e-05	0.00035332
novel_circ_0003349	7.96974	32.2663	-1.8963	1.3e-05	0.0003547
novel_circ_0006153	0	9.87816	-4.2994	1.3e-05	0.0003547
novel_circ_0000771	21.1889	54.6524	-1.384	1.32e-05	0.00035629
novel_circ_0021492	0	9.86737	-4.2959	1.33e-05	0.00035868
novel_circ_0015983	10.6047	34.9769	-1.6742	1.38e-05	0.00036828
novel_circ_0019075	12.0973	0	4.2521	1.39e-05	0.00036828
novel_circ_0002454	1.73587	17.2811	-2.8683	1.42e-05	0.0003747
novel_circ_0021093	0	9.97484	-4.2819	1.49e-05	0.00039157
novel_circ_0004422	0.711245	12.82	-3.5673	1.59e-05	0.0004136
novel_circ_0012945	1.70634	16.8462	-2.9526	1.66e-05	0.00042624
novel_circ_0021211	0	9.58839	-4.2585	1.66e-05	0.00042624
novel_circ_0002861	11.7417	0	4.2146	1.74e-05	0.00044434
novel_circ_0008367	80.2958	37.2424	1.0977	1.76e-05	0.00044776
novel_circ_0021614	1.49264	16.9645	-2.9891	1.86e-05	0.00046842
novel_circ_0002110	105.724	53.6428	0.97437	1.87e-05	0.00046877
novel_circ_0001214	20.395	2.6736	2.6555	1.97e-05	0.00049178
novel_circ_0020006	19.3891	52.4504	-1.383	2e-05	0.00049553
novel_circ_0011774	1.20879	14.6612	-3.167	2.09e-05	0.00051441
novel_circ_0018315	0	9.40561	-4.2193	2.13e-05	0.00052259
novel_circ_0010874	26.2035	4.09076	2.4584	2.26e-05	0.00054453
novel_circ_0015938	11.4193	0	4.173	2.26e-05	0.00054453
novel_circ_0020237	9.96524	33.4305	-1.7088	2.25e-05	0.00054453
novel_circ_0010715	0	9.16958	-4.1984	2.36e-05	0.00056331
novel_circ_0002503	0	9.10505	-4.1876	2.52e-05	0.0005988
novel_circ_0002000	0	9.47611	-4.1921	2.55e-05	0.00060034
novel_circ_0005757	9.40146	31.7823	-1.6971	2.56e-05	0.00060034
novel_circ_0018745	0.493853	11.9346	-3.5227	2.73e-05	0.00063769
novel_circ_0021294	10.0022	32.4801	-1.6494	2.75e-05	0.00063787
novel_circ_0005667	0	9.04053	-4.1726	2.77e-05	0.00063981
novel_circ_0018491	4.79292	24.5662	-2.188	2.81e-05	0.00064536
novel_circ_0006874	11.0709	0	4.1269	2.89e-05	0.00066063
novel_circ_0007399	4.01337	21.2224	-2.271	2.94e-05	0.00066571
novel_circ_0009636	10.9843	0	4.1244	2.95e-05	0.00066571
novel_circ_0016484	39.0099	12.4227	1.5797	3.05e-05	0.0006846
novel_circ_0012484	10.9089	0	4.1151	3.15e-05	0.00070364
novel_circ_0011945	10.7448	0	4.1044	3.26e-05	0.00072176
novel_circ_0016905	11.0859	0	4.1151	3.27e-05	0.00072176
novel_circ_0013233	10.2528	32.9097	-1.6303	3.29e-05	0.00072322
novel_circ_0016020	25.4201	5.47076	2.108	3.35e-05	0.00073305
novel_circ_0002455	0	8.76155	-4.1312	3.48e-05	0.00075385
novel_circ_0018079	10.6361	0	4.0931	3.49e-05	0.00075385
novel_circ_0001064	10.7337	0	4.0834	3.76e-05	0.00080542
novel_circ_0010923	37.2797	76.8846	-1.0196	3.76e-05	0.00080542
novel_circ_0004073	30.1099	8.04218	1.8279	3.9e-05	0.00083068
novel_circ_0005593	0	9.00356	-4.1124	4.04e-05	0.00085211
novel_circ_0007235	0	8.64859	-4.1057	4.06e-05	0.00085211
novel_circ_0015956	0	8.64859	-4.1057	4.06e-05	0.00085211
novel_circ_0005368	4.46868	24.6847	-2.2193	4.27e-05	0.0008904
novel_circ_0021629	10.8664	0	4.0627	4.42e-05	0.00091814
novel_circ_0016224	2.62759	17.5392	-2.6174	4.6e-05	0.00095026
novel_circ_0009843	10.286	0	4.0437	4.64e-05	0.00095335
novel_circ_0006582	0	8.39647	-4.077	4.68e-05	0.00095662
novel_circ_0014291	1.42249	14.0495	-3.042	4.89e-05	0.00099499
novel_circ_0004779	10.8777	0	4.0468	5.03e-05	0.0010179
novel_circ_0012855	27.2296	6.39929	1.9646	5.06e-05	0.0010192
novel_circ_0018386	0	8.41805	-4.059	5.26e-05	0.001054
novel_circ_0016054	0.493853	11.5103	-3.4494	5.34e-05	0.0010655
novel_circ_0009417	18.0123	2.17948	2.6622	5.41e-05	0.0010736
novel_circ_0000930	18.2611	46.4161	-1.335	5.54e-05	0.0010935
novel_circ_0006241	123.583	69.1756	0.84121	5.58e-05	0.0010962
novel_circ_0017421	27.0341	6.63581	1.9305	5.67e-05	0.001109
novel_circ_0003976	14.8505	1.14348	3.099	6.21e-05	0.0012091
novel_circ_0013461	0	8.18202	-4.0249	6.25e-05	0.0012113
novel_circ_0007223	0	8.10671	-4.0223	6.31e-05	0.0012165
novel_circ_0015941	33.4598	9.64693	1.6978	6.35e-05	0.0012191
novel_circ_0004499	9.78292	0	3.9836	6.4e-05	0.0012217
novel_circ_0016231	73.8296	124.558	-0.75037	6.44e-05	0.0012253
novel_circ_0005364	14.8246	1.25644	3.0755	6.53e-05	0.0012353
novel_circ_0006723	19.8864	3.46279	2.3239	6.76e-05	0.0012742
novel_circ_0009841	9.64469	0	3.9636	7.1e-05	0.0013261
novel_circ_0013413	18.967	46.6419	-1.2618	7.1e-05	0.0013261
novel_circ_0003877	4.86285	21.8343	-2.0646	7.29e-05	0.0013524
novel_circ_0017738	0	7.96158	-3.996	7.31e-05	0.0013524
novel_circ_0010889	9.63915	0	3.9561	7.44e-05	0.0013704
novel_circ_0020630	85.0382	158.399	-0.90186	7.89e-05	0.0014469
novel_circ_0021059	95.2402	49.4225	0.93031	7.97e-05	0.0014553
novel_circ_0015985	5.84871	23.2083	-1.8967	8.59e-05	0.0015598
novel_circ_0011906	9.42361	0	3.929	8.63e-05	0.0015615
novel_circ_0018753	0.711245	10.8609	-3.3127	9.35e-05	0.0016839
novel_circ_0013605	0	7.70947	-3.9415	9.75e-05	0.0017474
novel_circ_0004686	23.6215	5.44389	1.9963	0.00010052	0.0017944
novel_circ_0002453	4.21252	21.4961	-2.1033	0.00010521	0.00187
novel_circ_0013460	0	7.53198	-3.9225	0.00010721	0.0018973
novel_circ_0002101	9.11761	0	3.8747	0.00011367	0.0020029
novel_circ_0010613	148.743	88.901	0.74791	0.00011631	0.0020407
novel_circ_0005786	129.851	199.09	-0.61528	0.00011769	0.002056
novel_circ_0000920	25.0128	6.14168	1.9114	0.0001217	0.0021082
novel_circ_0012007	0.987706	13.008	-3.013	0.0001215	0.0021082
novel_circ_0006238	0	7.46745	-3.8976	0.0001233	0.0021268
novel_circ_0017024	35.3006	12.2889	1.4789	0.0001243	0.002135
novel_circ_0009249	50.0092	21.4584	1.1997	0.00012533	0.002141
novel_circ_0013639	0	7.40891	-3.8898	0.00012622	0.002141
novel_circ_0016045	5.88747	24.2501	-1.9034	0.00012592	0.002141
novel_circ_0009670	13.9954	1.25644	2.9924	0.00012698	0.002145
novel_circ_0000634	31.3498	64.2904	-1.0188	0.00013629	0.0022648
novel_circ_0013540	45.6863	18.5543	1.2871	0.0001354	0.0022648
novel_circ_0018889	0	7.253	-3.874	0.00013616	0.0022648
novel_circ_0020443	8.82106	0	3.843	0.0001349	0.0022648
novel_circ_0013872	17.2531	45.3756	-1.3813	0.00013685	0.0022649
novel_circ_0011620	0	7.53796	-3.8736	0.00014031	0.0023128
novel_circ_0007583	8.89283	0	3.8353	0.00014089	0.0023131
novel_circ_0016389	11.1666	32.8291	-1.5308	0.00014193	0.0023208
novel_circ_0007156	0	7.45735	-3.8653	0.00014599	0.002359
novel_circ_0007216	0	7.45735	-3.8653	0.00014599	0.002359
novel_circ_0013533	16.0223	1.90579	2.683	0.00014502	0.002359
novel_circ_0014435	16.483	2.39992	2.5203	0.00014711	0.0023677
novel_circ_0007905	8.65329	0	3.8177	0.00015131	0.0024162
novel_circ_0013255	0	7.38734	-3.8585	0.00015084	0.0024162
novel_circ_0002329	37.9783	76.089	-0.97427	0.00015373	0.0024453
novel_circ_0016028	31.5139	10.2701	1.5544	0.00015599	0.0024716
novel_circ_0012250	7.06488	24.9481	-1.7522	0.00015786	0.0024917
novel_circ_0003841	8.54829	0	3.8035	0.00016274	0.0025296
novel_circ_0007124	8.80445	0	3.8101	0.00016211	0.0025296
novel_circ_0011193	0	7.1669	-3.8414	0.00016266	0.0025296
novel_circ_0013971	0	7.28516	-3.8435	0.00016255	0.0025296
novel_circ_0002763	33.0045	10.356	1.6007	0.00016412	0.0025413
novel_circ_0005133	8.948	0	3.8055	0.0001659	0.0025593
novel_circ_0005538	1.06687	11.3867	-3.027	0.00016826	0.0025859
novel_circ_0002259	8.61474	0	3.7986	0.00017172	0.0026292
novel_circ_0009562	25.0259	5.7015	2.0018	0.00017289	0.0026372
novel_circ_0007714	8.75091	0	3.7913	0.00017827	0.0027092
novel_circ_0001516	0	6.96323	-3.8138	0.00018329	0.0027734
novel_circ_0014739	0	6.92557	-3.8126	0.00018385	0.0027734
novel_circ_0010888	8.29952	0	3.7654	0.00019634	0.0029401
novel_circ_0011511	75.6743	39.3625	0.93443	0.00019625	0.0029401
novel_circ_0005377	24.6387	6.5552	1.8128	0.00020136	0.0030042
novel_circ_0008603	0.995091	12.1281	-2.9168	0.0002036	0.0030266
novel_circ_0009749	84.0731	43.6089	0.92661	0.0002087	0.0030912
novel_circ_0019526	6.10671	23.6485	-1.851	0.00021161	0.003123
novel_circ_0012626	47.1383	20.2504	1.2003	0.00021676	0.0031874
novel_circ_0020662	0	7.29546	-3.7906	0.00022011	0.0032251
novel_circ_0004185	1.20879	11.5158	-2.8295	0.0002228	0.0032529
novel_circ_0017729	5.24985	20.9326	-1.8752	0.00022638	0.0032934
novel_circ_0002990	16.2746	2.31931	2.4912	0.00022778	0.003302
novel_circ_0018151	106.749	61.3325	0.79934	0.00023138	0.0033423
novel_circ_0013724	45.8356	18.2377	1.3154	0.00023618	0.0033878
novel_circ_0020880	0	7.00569	-3.7708	0.00023602	0.0033878
novel_circ_0013103	42.4652	17.3732	1.2714	0.00023911	0.0034058
novel_circ_0014267	8.0489	0	3.7253	0.00023833	0.0034058
novel_circ_0015992	11.4542	0.708581	3.0947	0.00024387	0.0034615
novel_circ_0004527	3.43297	17.6253	-2.1372	0.00024705	0.0034946
novel_circ_0017632	19.6448	3.51123	2.2612	0.00024851	0.0035032
novel_circ_0002748	192.129	282.085	-0.54747	0.00025623	0.0035995
novel_circ_0010364	7.97897	0	3.7095	0.00026109	0.0036553
novel_circ_0009747	0	6.60894	-3.7387	0.0002631	0.0036709
novel_circ_0000417	0	6.67346	-3.7369	0.0002672	0.0036902
novel_circ_0002065	33.8027	11.2361	1.518	0.00026632	0.0036902
novel_circ_0003762	14.2073	1.67525	2.7232	0.00026606	0.0036902
novel_circ_0015007	8.48759	0	3.7139	0.00027079	0.0037148
novel_circ_0016197	73.1645	37.6989	0.9474	0.00027035	0.0037148
novel_circ_0004386	0	6.50676	-3.7298	0.00027332	0.0037369
novel_circ_0004387	0	6.70033	-3.7304	0.00027728	0.0037658
novel_circ_0010853	0	6.70033	-3.7304	0.00027728	0.0037658
novel_circ_0002496	7.90697	0	3.6922	0.00028021	0.003793
novel_circ_0000416	0	6.47989	-3.7236	0.00028185	0.0038027
novel_circ_0004863	24.812	5.77612	1.9236	0.00028929	0.0038901
novel_circ_0003771	8.14489	0	3.6954	0.00029057	0.0038946
novel_circ_0007949	0.497545	9.68508	-3.1835	0.00031029	0.0041205
novel_circ_0015480	7.69328	0	3.6696	0.00031093	0.0041205
novel_circ_0020129	161.421	237.294	-0.54654	0.00031146	0.0041205
novel_circ_0020836	7.72466	0	3.6732	0.00030849	0.0041205
novel_circ_0002770	34.7018	12.8307	1.3811	0.00031506	0.0041548
novel_circ_0021489	0	6.43145	-3.6988	0.00031986	0.0042044
novel_circ_0000023	50.3632	22.2416	1.1533	0.00032345	0.0042097
novel_circ_0006893	1.24386	12.3695	-2.7287	0.00032438	0.0042097
novel_circ_0015544	1.98095	14.3232	-2.4465	0.00032336	0.0042097
novel_circ_0016660	0.711245	9.87335	-3.1327	0.0003233	0.0042097
novel_circ_0018489	0	6.7219	-3.699	0.00032748	0.0042366
novel_circ_0003840	11.1041	0.762317	3.0382	0.00033451	0.0043138
novel_circ_0003430	42.7214	17.8505	1.2293	0.00033836	0.0043497
novel_circ_0013563	41.1145	16.7668	1.2805	0.00035625	0.0045653
novel_circ_0017726	0.497545	9.41688	-3.1498	0.00035856	0.0045806
novel_circ_0018429	18.4491	3.57575	2.1889	0.00036377	0.0046327
novel_circ_0002701	4.89054	19.9981	-1.8889	0.00036535	0.0046383
novel_circ_0014138	7.73758	0	3.6411	0.00036686	0.0046431
novel_circ_0004602	1.06687	11.1447	-2.9479	0.00036838	0.004648
novel_circ_0013372	10.8849	0.762317	3.0191	0.00037224	0.0046822
novel_circ_0019633	0	6.22778	-3.6526	0.00039283	0.004926
novel_circ_0011964	0	6.15247	-3.6501	0.00039531	0.004942
novel_circ_0015315	0	6.31917	-3.6492	0.0004028	0.0050202
novel_circ_0003448	88.3789	145.18	-0.72101	0.00040886	0.0050486
novel_circ_0004939	16.3872	3.04397	2.2017	0.00040759	0.0050486
novel_circ_0005774	7.3395	0	3.6102	0.00041001	0.0050486
novel_circ_0008175	0	6.24386	-3.6452	0.00040859	0.0050486
novel_circ_0002672	13.1937	1.41716	2.6664	0.00042418	0.0052048
novel_circ_0009672	23.1906	5.93203	1.8318	0.00042524	0.0052048
novel_circ_0002703	0	6.06108	-3.6311	0.00043186	0.0052401
novel_circ_0004601	0	6.14168	-3.6324	0.00043198	0.0052401
novel_circ_0005219	0.740779	10.1255	-2.9374	0.0004307	0.0052401
novel_circ_0015982	17.2346	39.9804	-1.211	0.00043341	0.0052415
novel_circ_0020234	0	6.13639	-3.6311	0.00043466	0.0052415
novel_circ_0011040	26.3487	8.40726	1.5706	0.00043881	0.005276
novel_circ_0012905	64.5497	33.7204	0.92112	0.00046854	0.005617
novel_circ_0002621	43.9502	19.4289	1.1448	0.00048192	0.0057605
novel_circ_0005542	7.19388	0	3.5739	0.0004847	0.0057614
novel_circ_0006361	19.4719	4.51487	1.9487	0.00048482	0.0057614
novel_circ_0004221	33.4321	12.8636	1.3467	0.00051016	0.0060276
novel_circ_0009590	0	6.00734	-3.5972	0.00050892	0.0060276
novel_circ_0019624	0	6.1309	-3.5958	0.00051761	0.006098
novel_circ_0002255	7.16435	0	3.5582	0.0005196	0.0061039
novel_circ_0019797	759.002	536.923	0.49984	0.00052792	0.0061838
novel_circ_0007429	20.1296	5.06273	1.8723	0.00054354	0.0063486
novel_circ_0015252	1.2051	10.8933	-2.7222	0.00054605	0.0063597
novel_circ_0019801	2.55581	13.7974	-2.2176	0.0005656	0.0065687
novel_circ_0006335	1.4871	11.9399	-2.5098	0.00056914	0.006591
novel_circ_0005537	4.53492	18.5757	-1.8665	0.00057084	0.006592
novel_circ_0014967	15.8527	36.8289	-1.1903	0.00057977	0.0066661
novel_circ_0019428	0	5.87349	-3.5652	0.00058052	0.0066661
novel_circ_0007900	7.37436	0	3.5379	0.00058687	0.0067202
novel_circ_0010846	0	5.8627	-3.5611	0.00059179	0.0067576
novel_circ_0010720	8.1172	26.0975	-1.5607	0.00059684	0.0067964
novel_circ_0001056	0.740779	9.64213	-2.8771	0.00060082	0.0068226
novel_circ_0011109	7.16087	0	3.5326	0.00060466	0.0068473
novel_circ_0002519	6.8438	0	3.5196	0.00061408	0.0069156
novel_circ_0008360	6.8438	0	3.5196	0.00061408	0.0069156
novel_circ_0016481	40.0642	16.2834	1.2813	0.00061698	0.0069292
novel_circ_0000929	17.6163	42.1853	-1.2213	0.00062629	0.0070038
novel_circ_0003022	33.4157	11.9024	1.4421	0.00062706	0.0070038
novel_circ_0001694	91.5035	52.5112	0.80827	0.00064304	0.0071434
novel_circ_0002804	6.88072	0	3.5131	0.00064177	0.0071434
novel_circ_0010702	0	5.78739	-3.5381	0.00065698	0.0072622
novel_circ_0019761	7.00603	0	3.5118	0.00065729	0.0072622
novel_circ_0009141	6.84934	0	3.5045	0.00066275	0.0073027
novel_circ_0004685	6.7351	0	3.5	0.00067108	0.0073746
novel_circ_0017921	0.493853	8.64329	-3.0419	0.00067477	0.0073756
novel_circ_0020167	0	5.9488	-3.5352	0.00067415	0.0073756
novel_circ_0016022	14.1445	2.20635	2.3295	0.00068394	0.007436
novel_circ_0016466	0	5.72287	-3.5288	0.00068314	0.007436
novel_circ_0020665	0	5.64227	-3.526	0.00068772	0.0074572
novel_circ_0016664	5.31794	19.5848	-1.8117	0.00069666	0.0075342
novel_circ_0002535	0	6.01332	-3.5266	0.00070536	0.0075964
novel_circ_0013722	18.0476	3.70411	2.0683	0.00070613	0.0075964
novel_circ_0016621	17.5703	3.24235	2.1651	0.00071051	0.0076236
novel_circ_0015607	0	5.65305	-3.5181	0.00071445	0.0076458
novel_circ_0015174	2.90405	14.8656	-2.1686	0.00073434	0.0078381
novel_circ_0000786	0	5.63148	-3.5054	0.00075702	0.0080382
novel_circ_0014539	6.85303	0	3.4778	0.00075554	0.0080382
novel_circ_0002243	6.59687	0	3.4705	0.00076013	0.0080503
novel_circ_0021612	9.28353	26.5427	-1.4443	0.00076737	0.008106
novel_circ_0004904	0	5.60461	-3.5012	0.00077027	0.0081156
novel_circ_0014732	20.8058	48.432	-1.197	0.00077489	0.0081433
novel_circ_0011401	24.0382	7.26378	1.6454	0.00077698	0.0081443
novel_circ_0009763	25.577	7.82773	1.6525	0.00078051	0.0081604
novel_circ_0000582	6.99105	0	3.4694	0.00078381	0.008174
novel_circ_0004218	49.891	24.2873	1.0084	0.00078845	0.0082015
novel_circ_0020385	6.7755	0	3.4622	0.00079672	0.0082665
novel_circ_0003445	44.1771	77.0667	-0.78109	0.00082373	0.0085036
novel_circ_0010555	28.7478	9.68508	1.5032	0.00082314	0.0085036
novel_circ_0002195	6.69449	0	3.453	0.00083374	0.0085637
novel_circ_0008652	6.9892	0	3.4566	0.00083366	0.0085637
novel_circ_0008632	6.74618	0	3.4535	0.00084169	0.0086236
novel_circ_0011947	6.5214	0	3.4441	0.00086457	0.0088359
novel_circ_0002506	0	5.45468	-3.469	0.00087254	0.0088952
novel_circ_0004892	6.45495	0	3.4372	0.00087484	0.0088964
novel_circ_0018207	6.4568	0	3.4359	0.00088044	0.0089311
novel_circ_0020177	1.80765	11.7033	-2.4166	0.00088291	0.008934
novel_circ_0014682	17.9864	4.1445	1.9247	0.00089807	0.009065
novel_circ_0008265	6.77181	0	3.4364	0.00090174	0.0090796
novel_circ_0018337	0	5.42781	-3.4589	0.0009121	0.0091614
novel_circ_0010920	6.55626	0	3.4252	0.00093393	0.0093576
novel_circ_0003769	6.34625	0	3.4207	0.00093785	0.0093739
novel_circ_0008065	0	5.36329	-3.4484	0.00095214	0.0094935
novel_circ_0002646	12.9487	2.01876	2.377	0.00095909	0.0095395
novel_circ_0000052	6.49741	0	3.41	0.0010061	0.0099828
novel_circ_0004650	6.4771	0	3.4074	0.0010163	0.010059
novel_circ_0002258	6.31487	0	3.3968	0.001038	0.01025
novel_circ_0006612	34.5488	14.0656	1.2516	0.0010412	0.010256
novel_circ_0010422	6.31672	0	3.395	0.0010471	0.010289
novel_circ_0005370	9.67792	26.532	-1.3765	0.00105	0.010293
novel_circ_0010795	0	5.33642	-3.4218	0.0010707	0.010471
novel_circ_0005787	82.4004	129.857	-0.63803	0.0010767	0.010479
novel_circ_0012177	23.627	48.9846	-1.0349	0.0010757	0.010479
novel_circ_0018572	18.0677	4.30041	1.9192	0.0010851	0.010537
novel_circ_0013750	0	5.49714	-3.4198	0.0011033	0.010688
novel_circ_0001679	6.20987	0	3.3804	0.0011113	0.01074
novel_circ_0001209	9.53969	0.837627	2.8155	0.0011184	0.010783
novel_circ_0009256	12.7717	1.9811	2.3532	0.0011255	0.010826
novel_circ_0009312	6.13255	0	3.3767	0.0011323	0.010866
novel_circ_0009478	6.1344	0	3.3744	0.0011445	0.010951
novel_circ_0017733	107.059	161.496	-0.59329	0.0011465	0.010951
novel_circ_0008217	6.20249	0	3.3717	0.001156	0.01099
novel_circ_0019347	6.20249	0	3.3717	0.001156	0.01099
novel_circ_0008439	0	5.27189	-3.4014	0.0011665	0.011064
novel_circ_0002045	6.09748	0	3.3662	0.0011757	0.011075
novel_circ_0002939	29.124	57.0629	-0.93871	0.0011738	0.011075
novel_circ_0006724	6.13625	0	3.3695	0.0011709	0.011075
novel_circ_0011398	26.0081	8.83686	1.5012	0.0012035	0.01131
novel_circ_0011260	6.21356	0	3.3609	0.0012161	0.011402
novel_circ_0001699	104.263	63.0383	0.70677	0.0012328	0.011444
novel_circ_0001773	11.0895	1.14348	2.6703	0.0012254	0.011444
novel_circ_0012607	6.30749	0	3.3591	0.0012345	0.011444
novel_circ_0013232	64.1225	103.535	-0.67066	0.0012293	0.011444
novel_circ_0014047	94.9342	58.3358	0.70085	0.0012293	0.011444
novel_circ_0000165	18.4657	40.1406	-1.0876	0.0012569	0.011625
novel_circ_0016018	14.4579	2.74342	2.1625	0.0013068	0.012059
novel_circ_0014071	6.06795	0	3.3403	0.0013099	0.01206
novel_circ_0001621	8.29952	23.5955	-1.4382	0.0013195	0.012121
novel_circ_0002348	2.91513	14.4897	-2.1163	0.0013369	0.012254
novel_circ_0021486	11.6921	1.59994	2.4747	0.0013535	0.012379
novel_circ_0008779	0	5.06273	-3.3591	0.0013659	0.012464
novel_circ_0021490	0	4.99821	-3.353	0.0013965	0.012714
novel_circ_0012096	88.1562	52.2805	0.74458	0.0014305	0.012938
novel_circ_0015268	1.69895	11.0485	-2.3546	0.0014291	0.012938
novel_circ_0018757	5.95556	0	3.3193	0.0014267	0.012938
novel_circ_0016350	36.0248	16.1973	1.129	0.0014442	0.013033
novel_circ_0000310	11.2386	1.59994	2.4263	0.0014492	0.013049
novel_circ_0006782	0	5.0896	-3.3452	0.0014529	0.013054
novel_circ_0002874	15.1729	3.46279	1.9534	0.0014572	0.013064
novel_circ_0003842	6.01463	0	3.3135	0.001491	0.013309
novel_circ_0009449	6.27611	0	3.3144	0.0014943	0.013309
novel_circ_0010313	39.6385	72.8778	-0.86195	0.001492	0.013309
novel_circ_0018836	21.602	43.6739	-0.99694	0.0015042	0.013368
novel_circ_0010937	10.3522	1.06287	2.6023	0.0015126	0.013413
novel_circ_0005736	4.29168	16.4334	-1.7763	0.001524	0.013485
novel_circ_0018742	9.22261	0.708581	2.7762	0.001537	0.013571
novel_circ_0000068	63.9636	101.198	-0.66745	0.0015671	0.013802
novel_circ_0003868	0	4.98213	-3.3246	0.0015733	0.013802
novel_circ_0007357	0	4.98213	-3.3246	0.0015733	0.013802
novel_circ_0001650	29.4411	10.984	1.367	0.0015769	0.013804
novel_circ_0001147	6.00171	0	3.2963	0.001596	0.013941
novel_circ_0006645	5.7474	0	3.2861	0.0016266	0.014178
novel_circ_0008162	5.74001	0	3.285	0.0016333	0.014206
novel_circ_0006822	5.81917	0	3.2813	0.0016574	0.014385
novel_circ_0013513	9.90269	27.0369	-1.3815	0.0016621	0.014395
novel_circ_0018116	20.7693	5.9589	1.6794	0.0016867	0.014578
novel_circ_0003323	0.711245	7.73633	-2.8094	0.0017029	0.014686
novel_circ_0007155	0	4.86916	-3.3026	0.0017126	0.014739
novel_circ_0009633	31.6872	12.2834	1.319	0.0017175	0.01475
novel_circ_0003651	5.71232	0	3.2685	0.0017387	0.014901
novel_circ_0018243	6.14711	0	3.274	0.0017539	0.015
novel_circ_0000130	0	4.94977	-3.2966	0.0017646	0.01506
novel_circ_0015658	5.70863	0	3.2633	0.001778	0.015143
novel_circ_0005678	0	4.84229	-3.29	0.0018007	0.015249
novel_circ_0009979	65.722	37.1353	0.82725	0.0018013	0.015249
novel_circ_0015900	36.7252	16.7553	1.1066	0.0018017	0.015249
novel_circ_0002254	5.60363	0	3.253	0.0018444	0.015568
novel_circ_0014255	25.886	49.4661	-0.94038	0.001847	0.015568
novel_circ_0000055	5.60547	0	3.2512	0.0018589	0.015604
novel_circ_0013596	13.8037	2.58751	2.1127	0.0018553	0.015604
novel_circ_0017419	16.0387	3.85473	1.8728	0.0018881	0.015817
novel_circ_0006802	1.73772	11.226	-2.25	0.0019035	0.015908
novel_circ_0017161	44.9324	22.7578	0.96675	0.0019068	0.015908
novel_circ_0008533	5.59994	0	3.244	0.0019163	0.015955
novel_circ_0009515	135.903	91.0303	0.5794	0.0019358	0.016085
novel_circ_0014100	1.24386	10.5812	-2.4889	0.0019639	0.016285
novel_circ_0009303	26.6547	10.3131	1.319	0.0019899	0.016467
novel_circ_0017145	49.9708	24.3357	1.023	0.001994	0.016467
novel_circ_0001700	5.53001	0	3.2346	0.001999	0.016475
novel_circ_0013501	5.59809	0	3.2325	0.002012	0.016516
novel_circ_0018579	5.59809	0	3.2325	0.002012	0.016516
novel_circ_0007345	6.64118	22.6878	-1.6341	0.0020399	0.016711
novel_circ_0007208	0.711245	7.58042	-2.7759	0.0020703	0.016927
novel_circ_0017072	16.7853	37.3384	-1.1108	0.0021027	0.017157
novel_circ_0012523	36.4965	16.9704	1.0797	0.0021347	0.017384
novel_circ_0009902	0	4.71923	-3.2397	0.0021703	0.017603
novel_circ_0018385	0	4.71923	-3.2397	0.0021703	0.017603
novel_circ_0016976	5.53554	0	3.2137	0.0021825	0.017667
novel_circ_0006799	3.75722	14.6619	-1.8348	0.0021946	0.01773
novel_circ_0011439	5.38624	0	3.2055	0.0022208	0.017813
novel_circ_0016288	0	4.64392	-3.2333	0.0022169	0.017813
novel_circ_0017634	13.6435	2.53377	2.1141	0.0022223	0.017813
novel_circ_0021608	5.46355	0	3.2059	0.0022137	0.017813
novel_circ_0003266	9.67607	25.1573	-1.3059	0.002267	0.018132
novel_circ_0013549	5.27385	18.78	-1.6665	0.0022709	0.018132
novel_circ_0005329	36.902	63.9946	-0.77366	0.002313	0.018325
novel_circ_0015955	0	5.25562	-3.2359	0.0023017	0.018325
novel_circ_0018210	40.6444	19.9875	1.0018	0.0023079	0.018325
novel_circ_0021481	5.46724	0	3.1957	0.0023104	0.018325
novel_circ_0006379	57.2638	32.072	0.82169	0.0023549	0.018585
novel_circ_0009344	5.41946	0	3.1935	0.0023535	0.018585
novel_circ_0002720	21.2999	42.713	-0.96352	0.0023672	0.018646
novel_circ_0009644	5.41762	0	3.1907	0.0023803	0.018713
novel_circ_0008037	5.48755	0	3.1888	0.0023954	0.018795
novel_circ_0013870	29.0241	52.9831	-0.87894	0.0024003	0.018797
novel_circ_0006876	5.45801	0	3.1794	0.0024688	0.019297
novel_circ_0012777	3.93421	15.1285	-1.7576	0.0024962	0.019457
novel_circ_0020406	157.805	237.905	-0.60163	0.0024987	0.019457
novel_circ_0000710	0	4.52566	-3.1965	0.0025454	0.019782
novel_circ_0012918	5.24985	0	3.1675	0.0025555	0.019824
novel_circ_0003435	386.548	289.481	0.41668	0.0025647	0.019857
novel_circ_0018571	9.8307	1.06287	2.5124	0.0025752	0.019901
novel_circ_0019997	0	4.54174	-3.1908	0.0026047	0.02009
novel_circ_0002234	5.53902	0	3.1647	0.0026196	0.020167
novel_circ_0000591	0.740779	8.0261	-2.6151	0.0026289	0.020201
novel_circ_0015017	15.0383	3.31766	1.9366	0.0026649	0.02044
novel_circ_0000585	5.34932	0	3.1574	0.0026805	0.020444
novel_circ_0018680	6.06056	18.9407	-1.5722	0.0026798	0.020444
novel_circ_0019842	8.53906	0.837627	2.6484	0.0026795	0.020444
novel_circ_0007426	17.1644	3.70411	1.9451	0.0026905	0.020482
novel_circ_0010529	12.3313	2.25479	2.1307	0.0027002	0.020517
novel_circ_0009456	25.9915	49.6549	-0.8937	0.0027219	0.020644
novel_circ_0014266	28.908	11.2737	1.2737	0.0027607	0.0209
novel_circ_0008753	12.2005	2.25479	2.1157	0.0027877	0.021065
novel_circ_0016730	9.64654	1.25644	2.4645	0.0028071	0.021173
novel_circ_0003833	5.43033	18.0756	-1.6794	0.0028239	0.021205
novel_circ_0012843	41.8608	20.1226	1.0576	0.0028271	0.021205
novel_circ_0016286	1.24017	9.30941	-2.3493	0.002819	0.021205
novel_circ_0020203	73.5552	44.6291	0.71328	0.0028362	0.021235
novel_circ_0000773	8.90022	24.5442	-1.4094	0.0028544	0.02124
novel_circ_0004671	67.8828	36.2053	0.87334	0.0028576	0.02124
novel_circ_0018436	5.21663	0	3.1378	0.0028568	0.02124
novel_circ_0018819	5.13746	0	3.1387	0.0028499	0.02124
novel_circ_0020982	5.143	16.9913	-1.6033	0.0028837	0.021395
novel_circ_0004479	8.60182	0.837627	2.6503	0.002903	0.021421
novel_circ_0011354	14.6622	2.88806	2.017	0.0029019	0.021421
novel_circ_0021035	9.67053	24.8298	-1.2863	0.0028961	0.021421
novel_circ_0018495	5.12639	19.6817	-1.7671	0.0029109	0.021441
novel_circ_0013159	5.21847	0	3.132	0.0029243	0.021501
novel_circ_0017039	17.4889	36.1688	-1.045	0.0030067	0.022067
novel_circ_0012572	35.6913	16.364	1.106	0.0030284	0.022186
novel_circ_0008797	14.4413	2.9418	2.0148	0.0030488	0.022258
novel_circ_0019601	11.876	1.96502	2.227	0.003049	0.022258
novel_circ_0012756	5.10608	0	3.1191	0.0030561	0.02227
novel_circ_0001878	5.61655	51.1352	-2.5552	0.0030843	0.022436
novel_circ_0001469	27.7144	51.6514	-0.85934	0.0031075	0.022546
novel_circ_0004051	0.497545	6.97402	-2.7309	0.0031105	0.022546
novel_circ_0003206	1.23832	9.1535	-2.3307	0.0032136	0.023211
novel_circ_0013136	22.234	8.18202	1.3875	0.0032095	0.023211
novel_circ_0010877	44.4461	22.8864	0.9445	0.0032343	0.023319
novel_circ_0018164	5.03615	0	3.1044	0.0032435	0.023344
novel_circ_0009692	5.19838	18.9348	-1.6592	0.0032665	0.023468
novel_circ_0007727	14.5925	3.29609	1.9073	0.0032901	0.023556
novel_circ_0012617	0	4.43427	-3.1276	0.0032911	0.023556
novel_circ_0016361	32.7317	14.7264	1.1149	0.003296	0.023556
novel_circ_0004089	5.00293	0	3.0963	0.0033207	0.023691
novel_circ_0008645	16.354	34.3542	-1.0413	0.0033574	0.023828
novel_circ_0008873	5.10239	0	3.0954	0.0033539	0.023828
novel_circ_0021432	5.038	0	3.0961	0.003351	0.023828
novel_circ_0018473	12.8326	2.78107	1.9913	0.0034187	0.024221
novel_circ_0006304	5.00477	0	3.0868	0.0034463	0.024332
novel_circ_0011057	5.00477	0	3.0868	0.0034463	0.024332
novel_circ_0004710	4.99554	0	3.0851	0.0034676	0.024441
novel_circ_0006871	0	4.30041	-3.1053	0.0035239	0.024794
novel_circ_0011712	5.07655	0	3.0772	0.0035713	0.024956
novel_circ_0018685	0	4.32728	-3.1024	0.0035654	0.024956
novel_circ_0019529	0	4.26276	-3.1018	0.0035618	0.024956
novel_circ_0020521	0	4.32728	-3.1024	0.0035654	0.024956
novel_circ_0018909	4.96785	0	3.0657	0.0037073	0.025862
novel_circ_0011132	0	4.27355	-3.0889	0.0037364	0.025889
novel_circ_0011648	0	4.27355	-3.0889	0.0037364	0.025889
novel_circ_0012326	0	4.27355	-3.0889	0.0037364	0.025889
novel_circ_0016439	0	4.27355	-3.0889	0.0037364	0.025889
novel_circ_0002811	4.92746	0	3.0642	0.0037634	0.025988
novel_circ_0009401	0	4.40259	-3.089	0.0037592	0.025988
novel_circ_0000774	8.51322	22.1085	-1.3277	0.0038258	0.02634
novel_circ_0020411	310.027	224.974	0.46776	0.0038273	0.02634
novel_circ_0015508	10.9603	1.9811	2.1445	0.0038492	0.026447
novel_circ_0001754	24.6809	9.41159	1.332	0.0039257	0.026886
novel_circ_0010107	0	4.25197	-3.0741	0.0039402	0.026886
novel_circ_0012594	0	4.25197	-3.0741	0.0039402	0.026886
novel_circ_0013253	0	4.20902	-3.0726	0.0039527	0.026886
novel_circ_0014379	63.6877	37.4843	0.77129	0.0039515	0.026886
novel_circ_0016115	4.96416	0	3.0504	0.0039299	0.026886
novel_circ_0009136	9.20621	1.06287	2.4415	0.0039637	0.026916
novel_circ_0009495	4.25476	14.4952	-1.6582	0.0039902	0.027052
novel_circ_0021089	13.7944	30.1015	-1.0938	0.0040014	0.027082
novel_circ_0003565	2.72911	12.7453	-1.9052	0.004105	0.027692
novel_circ_0008491	12.9376	3.01711	1.8735	0.0040994	0.027692
novel_circ_0013820	18.4545	5.14814	1.6535	0.0041686	0.028075
novel_circ_0015094	3.29844	13.0989	-1.8105	0.0041934	0.028195
novel_circ_0015877	2.72358	12.5786	-1.8956	0.0042005	0.028196
novel_circ_0008322	0	4.13371	-3.0533	0.0042226	0.028298
novel_circ_0010086	4.75046	0	3.0243	0.0042817	0.028648
novel_circ_0000353	6.38133	18.6181	-1.4335	0.0043068	0.028768
novel_circ_0018213	13.7153	3.2752	1.9053	0.0043262	0.028851
novel_circ_0009949	27.7878	49.7134	-0.83015	0.0043357	0.028867
novel_circ_0009649	18.4383	5.72287	1.5827	0.0043766	0.029092
novel_circ_0012904	18.6647	6.11482	1.5021	0.0044176	0.029317
novel_circ_0006317	31.615	14.0119	1.1115	0.0044479	0.02947
novel_circ_0003937	8.16867	0.762317	2.5692	0.0044772	0.029592
novel_circ_0006956	0	4.10685	-3.0362	0.0044808	0.029592
novel_circ_0001103	21.2115	6.74328	1.57	0.0045667	0.030111
novel_circ_0009152	26.3215	53.2409	-0.96621	0.0046676	0.030726
novel_circ_0001285	12.9743	2.6736	1.9865	0.0047048	0.030922
novel_circ_0001543	0.991398	7.91314	-2.356	0.004727	0.030968
novel_circ_0012472	9.79932	23.8207	-1.2743	0.0047265	0.030968
novel_circ_0003767	4.67684	0	2.9956	0.0047667	0.031128
novel_circ_0014877	4.67684	0	2.9956	0.0047667	0.031128
novel_circ_0018011	31.1952	14.3393	1.0815	0.0047793	0.031161
novel_circ_0008531	42.9757	22.5918	0.92782	0.0048251	0.031409
novel_circ_0012805	3.05705	13.5609	-1.92	0.0048435	0.031479
novel_circ_0012804	21.4582	7.55953	1.4415	0.0048885	0.031721
novel_circ_0011943	4.63992	0	2.9836	0.0049439	0.03203
novel_circ_0020497	5.33271	0	2.9936	0.0049604	0.032086
novel_circ_0004362	9.10675	1.25644	2.3747	0.0049908	0.032231
novel_circ_0010897	4.68238	0	2.9819	0.0050117	0.032315
novel_circ_0000382	6.39219	18.409	-1.4962	0.0050535	0.03244
novel_circ_0003770	4.71723	0	2.9768	0.0050628	0.03244
novel_circ_0016628	23.3378	9.11103	1.3184	0.0050435	0.03244
novel_circ_0020477	4.83147	0	2.9788	0.005058	0.03244
novel_circ_0001547	4.61223	0	2.9696	0.0051668	0.033003
novel_circ_0016260	2.4748	12.0044	-1.9311	0.0051628	0.033003
novel_circ_0004468	15.4733	3.73647	1.8324	0.0051977	0.033148
novel_circ_0005273	21.766	8.38039	1.3112	0.0052728	0.033575
novel_circ_0003313	1.77811	10.077	-2.242	0.0052958	0.033617
novel_circ_0016490	16.2046	5.06273	1.5654	0.0052876	0.033617
novel_circ_0006357	4.53492	0	2.962	0.0053153	0.033688
novel_circ_0015801	21.1136	7.67181	1.3834	0.0053397	0.033791
novel_circ_0021204	24.4822	10.0986	1.2432	0.0053728	0.033947
novel_circ_0002260	4.53307	0	2.9554	0.0054424	0.034071
novel_circ_0003486	5.29763	0	2.9668	0.0054256	0.034071
novel_circ_0003914	4.54045	0	2.9571	0.0054121	0.034071
novel_circ_0004321	4.54045	0	2.9571	0.0054121	0.034071
novel_circ_0007721	11.2036	2.20635	2.0017	0.0054344	0.034071
novel_circ_0017962	4.53307	0	2.9554	0.0054424	0.034071
novel_circ_0003620	0.991398	8.13907	-2.3557	0.005544	0.034654
novel_circ_0001144	4.68607	0	2.9515	0.0055855	0.034756
novel_circ_0009849	4.50353	0	2.9462	0.0055858	0.034756
novel_circ_0020031	4.50353	0	2.9462	0.0055858	0.034756
novel_circ_0009507	60.4844	35.0515	0.76139	0.005608	0.034802
novel_circ_0021426	8.55014	21.4316	-1.265	0.0056102	0.034802
novel_circ_0011091	4.651	15.4027	-1.589	0.0056305	0.034875
novel_circ_0013506	7.88482	20.6585	-1.3558	0.0056819	0.03514
novel_circ_0013833	4.39484	14.4791	-1.5888	0.0057592	0.035511
novel_circ_0014548	4.63623	0	2.9411	0.0057542	0.035511
novel_circ_0001628	0.740779	7.25829	-2.4615	0.005776	0.035561
novel_circ_0002674	209.768	154.659	0.44133	0.0058132	0.035736
novel_circ_0002869	4.61777	0	2.9346	0.005856	0.035945
novel_circ_0009103	5.85056	17.1103	-1.4515	0.0058906	0.036049
novel_circ_0011144	0.711245	6.58737	-2.5498	0.005882	0.036049
novel_circ_0004526	49.4261	81.2711	-0.73289	0.0059036	0.036074
novel_circ_0002319	0.987706	7.97766	-2.3402	0.0059135	0.036081
novel_circ_0000263	4.54415	0	2.9297	0.0059629	0.036328
novel_circ_0002090	10.2472	1.96502	2.0614	0.0060315	0.036682
novel_circ_0008927	2.55212	10.9518	-1.8887	0.0060389	0.036682
novel_circ_0009455	26.4023	11.6448	1.1521	0.0060509	0.0367
novel_circ_0005759	1.06687	7.74712	-2.4079	0.0060728	0.036778
novel_circ_0001188	0	3.84395	-2.9418	0.0060903	0.03683
novel_circ_0011311	18.2502	5.76602	1.5529	0.0061243	0.036926
novel_circ_0019259	7.41128	0.708581	2.4815	0.0061233	0.036926
novel_circ_0006363	4.39484	0	2.9159	0.0061824	0.037167
novel_circ_0013385	4.39484	0	2.9159	0.0061824	0.037167
novel_circ_0004427	0	3.85473	-2.935	0.0062316	0.037228
novel_circ_0013871	10.8221	24.7013	-1.163	0.0062271	0.037228
novel_circ_0015558	4.43176	0	2.9152	0.006238	0.037228
novel_circ_0018053	0	3.85473	-2.935	0.0062316	0.037228
novel_circ_0020345	0	3.85473	-2.935	0.0062316	0.037228
novel_circ_0008224	0	3.87081	-2.9341	0.0062543	0.037271
novel_circ_0010903	4.58085	0	2.9123	0.0062901	0.037429
novel_circ_0011317	42.5361	19.4826	1.064	0.0063381	0.037605
novel_circ_0018401	52.189	81.0286	-0.62293	0.0063308	0.037605
novel_circ_0009131	4.4336	0	2.9081	0.0063926	0.037874
novel_circ_0009971	20.0429	7.20456	1.3681	0.0064287	0.038033
novel_circ_0013396	4.42437	0	2.9059	0.0064382	0.038034
novel_circ_0016335	14.607	4.30041	1.627	0.0064861	0.038262
novel_circ_0000132	2.41389	10.2593	-1.9098	0.0065323	0.038478
novel_circ_0002139	4.08884	14.8663	-1.7552	0.0065747	0.038672
novel_circ_0014994	4.474	0	2.8964	0.0066094	0.038821
novel_circ_0005446	0	3.80629	-2.9154	0.0066388	0.038881
novel_circ_0007789	0	3.80629	-2.9154	0.0066388	0.038881
novel_circ_0003083	4.40222	0	2.8947	0.0066567	0.038931
novel_circ_0002864	4.42253	0	2.8938	0.0067112	0.039194
novel_circ_0005343	0	3.79021	-2.9103	0.0067444	0.039275
novel_circ_0019038	0	3.79021	-2.9103	0.0067444	0.039275
novel_circ_0012159	0.740779	6.96323	-2.4118	0.0068367	0.039756
novel_circ_0000680	4.36346	0	2.8826	0.0068919	0.039933
novel_circ_0000686	9.00913	1.25644	2.3307	0.0068964	0.039933
novel_circ_0011963	2.47665	11.4352	-1.8726	0.0068851	0.039933
novel_circ_0020575	36.1187	18.3444	0.94934	0.0069398	0.040127
novel_circ_0009338	4.29168	0	2.8787	0.0069947	0.040387
novel_circ_0021451	4.36715	0	2.8749	0.0070773	0.040751
novel_circ_0021591	37.25	18.9832	0.92952	0.0070777	0.040751
novel_circ_0000758	2.51889	10.8609	-1.9314	0.0071195	0.040877
novel_circ_0009975	31.3369	15.1721	1.023	0.0071145	0.040877
novel_circ_0011073	9.536	1.67525	2.1553	0.0071929	0.04124
novel_circ_0001473	4.29353	0	2.8695	0.0072168	0.041243
novel_circ_0007498	4.29353	0	2.8695	0.0072168	0.041243
novel_circ_0008843	35.4149	18.2806	0.94281	0.0072337	0.041243
novel_circ_0012412	4.40407	0	2.8706	0.007225	0.041243
novel_circ_0006572	2.20019	9.87816	-1.9021	0.0073016	0.041572
novel_circ_0012302	3.76091	12.67	-1.6363	0.0073925	0.042031
novel_circ_0009244	4.25845	0	2.8583	0.0074495	0.042297
novel_circ_0007108	3.40529	12.0953	-1.6866	0.0074632	0.042301
novel_circ_0021576	4.25476	0	2.8574	0.007471	0.042301
novel_circ_0007193	57.0004	87.3161	-0.59683	0.0075104	0.042466
novel_circ_0008841	4.71745	0	2.863	0.0075758	0.042776
novel_circ_0021399	1.56441	8.39647	-2.1217	0.00762	0.042966
novel_circ_0011264	7.26935	0.708581	2.4369	0.0076735	0.043209
novel_circ_0005743	6.84749	18.4514	-1.3511	0.0077114	0.043362
novel_circ_0000450	7.35058	0.708581	2.4502	0.0077892	0.043693
novel_circ_0012549	28.3795	50.3424	-0.79875	0.0077917	0.043693
novel_circ_0002875	25.2265	10.9254	1.1634	0.0078495	0.043957
novel_circ_0012311	85.551	56.044	0.60929	0.0078856	0.044099
novel_circ_0008375	1.98095	9.87816	-1.9347	0.0079956	0.044653
novel_circ_0013075	4.14976	0	2.8322	0.0080891	0.045052
novel_circ_0016195	4.14976	0	2.8322	0.0080891	0.045052
novel_circ_0002862	4.14791	0	2.8317	0.008101	0.045057
novel_circ_0010059	2.79905	10.984	-1.7763	0.0082064	0.045581
novel_circ_0018619	26.979	46.7495	-0.78138	0.0082603	0.045818
novel_circ_0008463	35.5605	18.7472	0.90345	0.0082914	0.045867
novel_circ_0014533	4.26215	0	2.8266	0.008281	0.045867
novel_circ_0021322	16.7077	5.83584	1.4254	0.008338	0.046062
novel_circ_0018009	188.912	139.944	0.43763	0.0083904	0.046289
novel_circ_0018293	1.91634	9.3147	-2.033	0.0085655	0.047191
novel_circ_0007300	25.5879	11.3335	1.1504	0.0085864	0.047224
novel_circ_0011899	4.15345	0	2.8138	0.0085945	0.047224
novel_circ_0010665	33.3289	54.7332	-0.70423	0.0086079	0.047233
novel_circ_0019094	4.33392	0	2.8129	0.0086545	0.047425
novel_circ_0009818	6.98018	18.7371	-1.3156	0.0087199	0.04772
novel_circ_0000526	4.22523	0	2.8075	0.0087654	0.047777
novel_circ_0013816	4.22523	0	2.8075	0.0087654	0.047777
novel_circ_0016340	14.8209	4.43427	1.5754	0.0087524	0.047777
novel_circ_0006058	4.22338	0	2.8071	0.0087779	0.047782
novel_circ_0009740	18.7588	36.3408	-0.90469	0.0087923	0.047797
novel_circ_0012165	4.53492	14.1033	-1.4918	0.0089513	0.048596
novel_circ_0010994	4.17375	0	2.7991	0.009056	0.0491
novel_circ_0015455	36.6366	19.0801	0.91427	0.0090929	0.049234
novel_circ_0005936	4.03922	0	2.7931	0.0091486	0.04934
novel_circ_0012948	4.03922	0	2.7931	0.0091486	0.04934
novel_circ_0014861	4.03922	0	2.7931	0.0091486	0.04934
novel_circ_0011432	7.23797	0.708581	2.4036	0.0092162	0.049639
novel_circ_0012160	4.35607	14.5705	-1.6188	0.0092734	0.049881
novel_circ_0000270	4.11838	0	2.7874	0.0093138	0.049946
novel_circ_0012280	4.04475	0	2.7866	0.0093456	0.049946
novel_circ_0013313	4.04475	0	2.7866	0.0093456	0.049946
novel_circ_0014048	4.14237	0	2.7878	0.0093466	0.049946
novel_circ_0018591	4.11469	0	2.7864	0.0093409	0.049946
Differentially expressed circRNAs between 6hpi and 3hpi
ID	T_6h_readcount	T_3h_readcount	log2FoldChange	pval	padj
novel_circ_0019696	221.87	573.83	-1.356	5.19e-27	8.23e-24
novel_circ_0019800	510.68	254.322	0.99761	1.52e-15	1.21e-12
novel_circ_0006066	292.526	622.584	-1.0829	2.78e-15	1.47e-12
novel_circ_0021591	41.1945	0	4.2981	5.09e-15	2.02e-12
novel_circ_0002433	462.223	880.05	-0.9135	9.86e-14	3.13e-11
novel_circ_0000958	288.376	126.568	1.1632	3.3e-13	8.72e-11
novel_circ_0019797	841.185	462.769	0.85707	1.8e-12	3.99e-10
novel_circ_0020129	178.836	395.386	-1.1172	2.01e-12	3.99e-10
novel_circ_0020406	174.441	446.64	-1.334	3.22e-12	5.68e-10
novel_circ_0002431	139.015	287.938	-1.0306	2.01e-11	2.89e-09
novel_circ_0013692	621.495	975.214	-0.6497	1.85e-11	2.89e-09
novel_circ_0006591	61.3327	161.993	-1.3606	4.28e-10	5.66e-08
novel_circ_0008663	56.6075	154.944	-1.3907	8.04e-10	9.81e-08
novel_circ_0012945	1.87881	31.1707	-3.013	3.37e-09	3.82e-07
novel_circ_0014781	71.4478	16.7101	1.9238	4.53e-09	4.79e-07
novel_circ_0001069	1.88778	30.0769	-2.9652	6.89e-09	6.43e-07
novel_circ_0021339	514.266	307.541	0.73022	6.86e-09	6.43e-07
novel_circ_0001078	3.26074	35.6926	-2.7223	9.64e-09	8.5e-07
novel_circ_0013576	17.2909	72.5843	-1.8708	2.5e-08	2.09e-06
novel_circ_0013578	17.1288	74.302	-1.9345	3.28e-08	2.6e-06
novel_circ_0004305	2.82495	30.1363	-2.6722	5.19e-08	3.92e-06
novel_circ_0016139	160.091	294.18	-0.86821	5.76e-08	4.15e-06
novel_circ_0007905	9.57769	46.9072	-2.041	8.68e-08	5.99e-06
novel_circ_0001064	11.9102	53.6008	-1.9464	1.04e-07	6.86e-06
novel_circ_0020106	9.20092	48.8433	-2.1057	1.26e-07	7.99e-06
novel_circ_0003448	97.7927	200.451	-1.0215	2.07e-07	1.26e-05
novel_circ_0001549	329.411	201.991	0.698	1.15e-06	6.63e-05
novel_circ_0003348	80.7051	165.87	-1.0144	1.17e-06	6.63e-05
novel_circ_0020798	18.077	60.598	-1.6271	1.6e-06	8.73e-05
novel_circ_0020099	18.1614	59.3898	-1.5821	1.75e-06	9.23e-05
novel_circ_0007111	91.5334	171.287	-0.88849	2.81e-06	0.00014379
novel_circ_0007807	1.10733	19.3372	-2.5872	4.05e-06	0.00020097
novel_circ_0020263	5.80661	31.5289	-2.0351	4.89e-06	0.00023507
novel_circ_0002429	37.2581	211.74	-2.0671	8.28e-06	0.00038634
novel_circ_0001067	3.30631	25.7846	-2.2134	9.88e-06	0.00044757
novel_circ_0004304	5.78884	34.3545	-2.0354	1.15e-05	0.0005083
novel_circ_0000771	23.3978	66.9276	-1.4233	1.73e-05	0.00074083
novel_circ_0001977	118.347	57.0488	1.0069	1.85e-05	0.00075041
novel_circ_0002763	36.5588	8.70321	1.7879	1.82e-05	0.00075041
novel_circ_0014380	68.1664	25.8741	1.3013	2.87e-05	0.0011389
novel_circ_0016023	120.275	60.7294	0.95596	3.53e-05	0.0013674
novel_circ_0020682	128.451	257.228	-0.9771	4.12e-05	0.0015576
novel_circ_0006225	10.8685	38.6287	-1.6257	4.89e-05	0.001804
novel_circ_0018151	118.245	196.302	-0.71574	5.26e-05	0.0018966
novel_circ_0012829	10.9341	39.2623	-1.6402	6.87e-05	0.0023694
novel_circ_0017488	239.947	153.248	0.63476	6.83e-05	0.0023694
novel_circ_0016350	39.8972	11.6457	1.5506	7.06e-05	0.0023825
novel_circ_0000124	3.76435	21.6393	-1.973	7.34e-05	0.0024255
novel_circ_0017367	76.4504	166.226	-1.0788	9.86e-05	0.0031915
novel_circ_0015739	48.9623	101.921	-1.0046	0.00010298	0.0032664
novel_circ_0012549	31.4022	72.0242	-1.1141	0.00014052	0.0043699
novel_circ_0020262	9.93669	35.9233	-1.5702	0.00016896	0.0051533
novel_circ_0005742	4.70376	23.2616	-1.8329	0.00017256	0.0051637
novel_circ_0014136	69.6266	125.718	-0.81979	0.00018171	0.0053368
novel_circ_0012875	26.5109	67.732	-1.2495	0.00027631	0.0079676
novel_circ_0009429	2.20794	16.6556	-1.9735	0.00031178	0.0086752
novel_circ_0010441	9.19419	31.6417	-1.5266	0.00030742	0.0086752
novel_circ_0009124	4.4559	26.4299	-1.9251	0.0003439	0.009404
novel_circ_0013247	13.5533	39.2506	-1.3499	0.00038456	0.010338
novel_circ_0008367	88.8849	46.4342	0.89937	0.00040499	0.010705
novel_circ_0011040	29.1689	8.47404	1.5079	0.00046667	0.012134
novel_circ_0005850	163.389	244.914	-0.58209	0.00049255	0.0124
novel_circ_0008630	5.87891	23.5419	-1.6539	0.00048837	0.0124
novel_circ_0002588	29.0487	8.24923	1.5298	0.0005182	0.012842
novel_circ_0011720	4.40692	23.1677	-1.7669	0.00054747	0.013358
novel_circ_0000894	55.7119	100.633	-0.82756	0.00056074	0.013475
novel_circ_0005436	4.58813	20.9625	-1.7035	0.00063717	0.015083
novel_circ_0000957	35.8227	11.761	1.4059	0.00067484	0.015512
novel_circ_0015035	16.0626	41.9581	-1.2495	0.00066528	0.015512
novel_circ_0009171	16.4494	48.8496	-1.3424	0.00069075	0.01565
novel_circ_0014850	2.55484	17.1554	-1.8805	0.00074215	0.016578
novel_circ_0006490	62.1167	25.5773	1.153	0.00077037	0.016969
novel_circ_0007574	45.6761	13.7988	1.4529	0.000801	0.017403
novel_circ_0010339	208.641	141.642	0.54523	0.00083836	0.017968
novel_circ_0017480	54.072	25.0289	1.0346	0.00086535	0.018299
novel_circ_0001361	76.6538	127.604	-0.71454	0.00098189	0.020368
novel_circ_0016529	5.47316	22.631	-1.5958	0.00098884	0.020368
novel_circ_0007782	6.54149	24.0027	-1.553	0.0010742	0.021566
novel_circ_0012338	112.728	64.8917	0.77574	0.0010651	0.021566
novel_circ_0019632	12.0136	43.2285	-1.5409	0.0011368	0.022537
novel_circ_0012725	14.3248	37.8853	-1.2414	0.0013642	0.026711
novel_circ_0015174	3.2219	17.0006	-1.7244	0.0015426	0.029836
novel_circ_0002115	15.9925	38.9022	-1.147	0.0015925	0.03043
novel_circ_0016980	37.4369	14.6591	1.1941	0.0016783	0.031688
novel_circ_0006241	136.859	205.587	-0.56555	0.0017522	0.032694
novel_circ_0009223	19.3734	44.3691	-1.0812	0.0019477	0.035919
novel_circ_0006106	33.5138	11.7415	1.2903	0.0020759	0.037844
novel_circ_0016389	12.366	33.8164	-1.2755	0.0021825	0.039334
novel_circ_0009740	20.7784	46.7345	-1.0527	0.002241	0.039936
novel_circ_0019885	15.2343	37.0702	-1.1528	0.0023217	0.040914
novel_circ_0015217	20.1648	5.4012	1.4867	0.0023616	0.041159
novel_circ_0020094	6.64608	22.4695	-1.4228	0.0024728	0.042628
novel_circ_0016420	6.14902	21.4758	-1.4663	0.0025289	0.043127
novel_circ_0011479	21.7035	47.277	-1.0275	0.0026458	0.04464
novel_circ_0001694	101.484	59.6657	0.74055	0.0027126	0.045286
novel_circ_0018493	8.74719	25.3589	-1.3092	0.0027413	0.045288
novel_circ_0016475	37.4583	78.0137	-0.99289	0.002797	0.045733
novel_circ_0005447	18.8696	4.76764	1.5147	0.0028837	0.046668
novel_circ_0007300	28.3751	10.3041	1.2602	0.0029878	0.04705
novel_circ_0010442	4.87617	19.1032	-1.5078	0.0029635	0.04705
novel_circ_0020833	66.3053	35.1715	0.86155	0.0029963	0.04705
novel_circ_0015465	10.297	28.6102	-1.2537	0.003169	0.048733
novel_circ_0016189	50.0663	86.0084	-0.75395	0.0031583	0.048733
novel_circ_0017672	36.7267	69.3139	-0.86662	0.0031956	0.048733
novel_circ_0003882	14.9629	2.97699	1.6176	0.0032715	0.049416
